# Supplementary material for: Cloud macro-physical properties in Saharan dust laden and dust free North Atlantic trade wind regimes: A lidar study
Source: Copernicus journal article supplement (doi:10.5194/acp-2019-26), 2019-02-05
Supplement: Supplementary file [file acp-2019-26-AC1-supplement.pdf]

# Author's Comments

Manuel Gutleben, Silke Groß and Martin Wirth

June 13, 2019

First of all, the authors would like to thank the referees for carefully reading the manuscript and for their helpful suggestions, feedbacks and comments. In the following, all comments and questions will be addressed and answered. The comments are repeated and a direct response is given below. In addition changes in the manuscript are highlighted by blue (additions) and red (removals) color and a marked-up manuscript version (generated with latexdiff) is appended. We would like to start with the reply to Referee #2 due to thematic overlapping of several comments by both referees.

## Reply to Anonymous Referee #2

### Major Comments concerning the structure

**Comment:** The weakest part of this paper is the missing explanation about how the dust in the higher atmosphere is influencing the cloud macro-physical properties. The authors mention some papers in the introduction and compare their results to some publications in the conclusions, but there is a section missing which explains the results in detail. For example, the authors mention a paper which shows a convection suppressing characteristic of the SAL with the main player being a dry anomaly in SAL-altitudes, but they cannot confirm a dry anomaly in SAL altitudes with their measurements. For this reason, the authors should make clear why they still believe that SAL causes a suppressing characteristic on the clouds. In addition, the authors should make it very clear in the beginning (probably in the abstract or in the headline) that this study is a case study, which is based on four research flights.

**Response:** Thank you for this very helpful comment to improve the manuscript. In the revised manuscript we focused on answering all these questions/comments starting with an improved discussion of differences in meteorological parameters in dust-laden compared to dust-free regimes. We compared our results to hypotheses of previous studies that concentrated on the modification of boundary layer cloudiness due to enhanced boundary layer wind speeds and relative humidities to find possible other factors that play a role for convective suppression. However, wind speeds and moisture in both regimes do not differ significantly between both regimes. Thus, the elevated Saharan Air Layer seems to play the driving role in convective suppression and may be used as a proxy for less and shallower clouds. We did not introduce a new chapter to address all these comments/questions and to relate previous findings to our results but rather discussed them in the respective chapters. Almost all made changes are also discussed in the following major and minor comments. Moreover, we agree with you that this study is a lidar case study and updated the title to "Cloud macro-physical properties in Saharan dust laden and dust free North Atlantic trade wind regimes: A lidar case study". All changes and additions can be tracked in the appended marked-up manuscript version.

### Major Comments concerning the data set

**Comment:** In this study, the authors focus on a dataset from the NARVAL-II campaign. In particular, they focus on four research flights where dust and dust free regions were sampled. If the authors would also look at the measurements from the first NARVAL campaign in 2013, they could extend their dataset and improve the statistics.

**Response:** We followed your suggestion and extended our analysis to the dust-free winter season, by including sampled NARVAL-I data in trade wind regions to our analysis. We added NARVAL-I flight tracks to the shown map-plot (discussed in section 'Minor Comments' of Referee #2) and included the cloud top height and cloud (gap) length distribution to our analysis (shown below). This data set substantially extends the statistics and shows that higher-reaching boundary layer clouds embedded in a deeper marine boundary layer prevail during

winter season. Moreover, the cloud fraction was found to be higher in winter season and less short clouds but more short cloud gaps were detected. We discussed the derived distributions in the revised manuscript in the respective sections (see appended marked-up manuscript version).

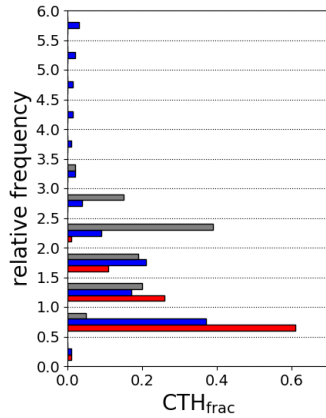

Figure 1: Histograms of detected cloud top height fractions during NARVAL-I and II with bins of 0.5 km size. Red bars illustrate the distribution of cloud top height fractions in SAL-regions. Blue bars represent the derived cloud top height distribution from measurements in the dust-free trades during NARVAL-II. Grey bars show the derived cloud top height in the dust-free winter season during NARVAL-I.

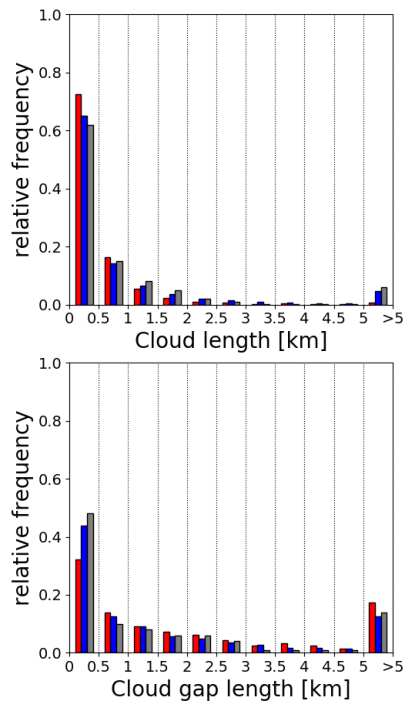

Figure 2: Histograms of detected cloud lengths (top) and cloud gap lengths (bottom). Red bars illustrate the distribution of marine low cloud (gap) lengths located below Saharan dust layers. Blue bars represent the distribution derived from measurements in the dust-free trades during NARVAL-II. Grey bars show the derived distribution in the dust-free winter season during NARVAL-I.

## Major Comments concerning the analysis

**Comment:** The authors compare the dust layer properties with the macro-physical properties of the clouds and see some correlations. However, the authors don't exclude other possibilities, which could cause the changes in clouds as well. For example, in their case study from the 19. August 2016, the authors compare a dust-laden region with a dust-free region and argue that in the latter, the cloud top heights reach almost twice as high. But they don't mention that in addition to dust, the dynamical properties are completely different as well. Stevens et al. (2019) showed for the exact same flight the vertical velocity measurements, which explain why there are more clouds in one region than in the other.

**Response:** Thank you for this valuable comment. In the revised manuscript, we discuss other possible factors causing the observed correlations in the respective regimes. As you already mentioned, Stevens et al. (2019) and Bony and Stevens (2019) show that derived vertical motions from dropsonde measurements indicate a rising motion in dust-free regions and a down-welling motion in dust-laden ones. These observations for sure explain why cloud tops are located in higher altitudes in dust-free regions. Nuijens et al. (2009) and Nuijens and Stevens et al. (2012) found that high wind speeds at surface level correspond to an increase of boundary layer humidity as well as vertical motion leading to a deepening of the cloud layer and increased rainfall. Lonitz et al. (2015) found from Large-Eddy simulations that even slight changes in boundary layer humidity impact shallow cloud development. We tested all these hypotheses by analyzing averaged vertical profiles of wind speed and direction as well as humidity from dropsonde measurements in the respective regimes (proposed in the next major comment and also addressed and suggested by Referee #1), but found no differences in boundary layer altitudes for these parameters. This is why we came to the conclusion that we believe that Saharan dust is changing meteorological conditions and can be used as a proxy for a decrease in cloud top height and cloud fraction. Earlier studies by Dunion and Velden (2004), Stephens et al. (2004) or Wong and Dessler (2005) fortify a suppressing characteristic of the Saharan Air Layer on convection analyzing passive remote sensing data sets. We addressed all these findings in our revised manuscript, related them to our findings and discussed them → see appended marked-up manuscript version)

**Comment:** For the same case study, the authors focus only on two single dropsondes. I would recommend to average over the dropsonde data from the single circle patterns to get more robust results. Otherwise, it comes across as cherry picking.

**Response:** To highlight the difference of measured lidar and dropsonde profiles in the respective regimes we made two changes in the revised manuscript. First, we plotted the flight track on top of MODIS real-color and aerosol optical depth imagery, in a way that the two different regimes can easily be detected (see minor comments). Second, we followed your recommendation and averaged vertical profiles of all sondes in dust-laden and dust-free regimes. This makes the result more robust and shows that the previous profiles of single sondes were representative for both regimes. The main features persist in the revised graph. Following a suggestion of Referee #1 we have additionally plotted average profiles of wind speed and direction as well as humidity and added 4 plots which highlight the difference between the respective regimes. Moreover, we adapted the text to the reworked plot (not shown here - can be seen in the appended marked-up manuscript version):

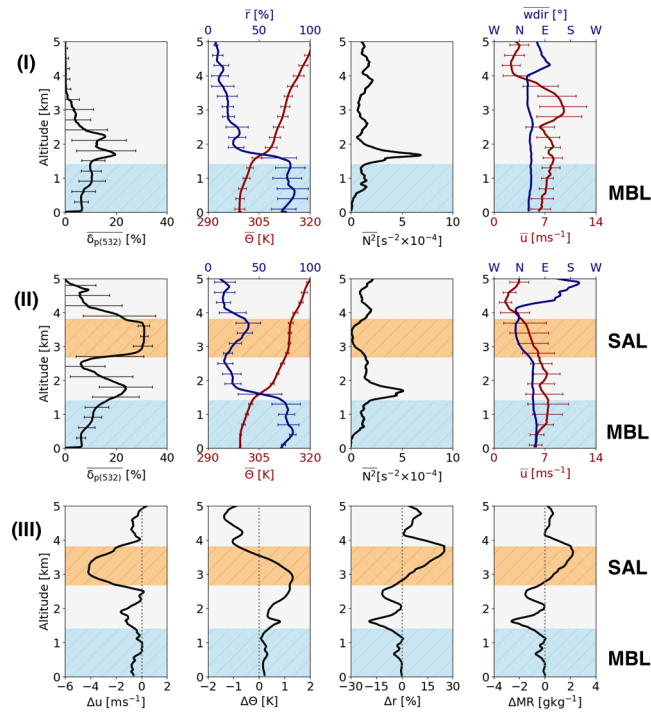

Figure 3: Mean vertical WALES lidar profiles of  $\delta_{p532}$  and mean vertical dropsonde profiles of relative humidity ( $r$ ), potential temperature ( $\theta$ ), squared Brunt-Väisälä frequency  $N^2 = \frac{g}{\theta} \frac{d\theta}{dz}$  as well as wind speed ( $u$ ) and direction ( $wdir$ ) in dust-free (I) and dust-laden (II) regions during RF6 on 19 Aug 2016 (horizontal bars indicate standard deviations). Differences in wind speed, potential temperature, relative humidity and water vapor mass mixing ratio (MR) between the two regions are shown in (III).

## Minor Comments

**Comment:** Page 1, Line 4: ...impact on the Earth's radiation budget... Shallow trade wind clouds have also an impact on the total precipitation in the tropics (Short and Nakamura, 2000), which has an important role for the boundary layer (Jensen et al., 2000).

5 **Response:** We modified the sentence in the abstract to address these points: "Shallow trade wind clouds have a significant impact on the Earth's radiation budget as well as on total tropical precipitation and marine boundary layer dynamics and are still introducing large uncertainties in climate sensitivity estimates, because of their poor representation in climate models."

10 **Comment:** Page 1, Line 5: The abbreviation is easier to understand when you change it to: "Next generation Aircraft Remote-sensing for VALidation".

**Response:** We followed the suggestion and changed the explanation of the abbreviation in the text.

15 **Comment:** Page 1, Line 5: You mention the NARVAL studies, which include measurements from 2013, the NARVAL South campaign. In your manuscript, you only analyze data from the NARVAL2 campaign in 2016. By mentioning both campaigns in the abstract, it gives the impression that you analyze both data sets.

**Response:** We clarified that by adding the NARVAL-I data set to the analysis (explained in detail in section 'Major comments concerning the data set').

20 **Comment:** Page 1, Line 10-15: You mention the macro-physical properties of the clouds (shallower, lower cloud fraction) in dust-laden regions, but you don't explain why and how Saharan dust is causing that.

25 **Response:** We added a sentence which sums up the major findings of our conducted dropsonde analysis to address the presence of two additional inversions which are stabilizing the environment and are counteracting convective development: The cloud fraction in the dust-laden summer trades is only 14% compared to a fraction of 31% and 37% in dust-free trades and the winter season. Dropsonde-measurements show that long-range transported Saharan dust layers come along with two additional inversions which counteract convective

development, stabilize the stratification and may lead to a decrease of convection in those areas.”

**Comment:** Page 1, Line 24 to page 2, Line 7: These are the only lines where you explain how SAL influence the cloud macro-physical properties. In addition to that, you should spend more time (before your conclusions) discussing these theories and connecting them to your results.

**Response:** Within the revised manuscript we explained all those theories and discussed them in the respective sections. As also proposed by Referee #1 we added a paragraph in the Introduction and elaborate in more detail how dust impacts cloud-formation and why dust can act as a good cloud condensation nucleus. Furthermore, we discussed hypotheses by Nuijens et al. (2009), Nuijens and Stevens (2012) and Lonitz et al. (2015) (discussed in section “Major comments” and also addressed and suggested by Referee #1) that changes in boundary layer wind speed and humidity modify vertical motion and thus cloud development and related them to our results. In the revised dropsonde analysis we discuss changes in SAL-associated meteorology and that additional SAL-related inversions counteract convective development (see appended marked-up manuscript version).

**Comment:** Page 2, Line 1019: It is good to mention the prior campaigns, even if they didn’t focus on trade wind clouds. Nevertheless, did these campaigns look also at the cloud macro-physical properties? If they did, are the results similar to your results?

**Response:** To our knowledge none of the mentioned campaigns investigated macro-physical cloud properties. Those campaigns rather focused on aerosol and cloud micro-physics to study the aerosol and cloud radiative effect: “Within this series of closure experiments, which included airborne and ground-based in-situ and remote sensing measurements as well as modeling efforts, micro-physical, chemical and radiative properties of dust were investigated at the beginning of its long-range transport near the source regions as well as after its long-range transport in the vicinity of Barbados.”

**Comment:** Page 2, Line 26: You mention CloudSat here. The sensitivity of CloudSat is too low to measure trade wind clouds properly. That might also be a reason why nobody looked at the interplay between SAL and trade wind clouds before by using these kind of data. The upcoming EarthCARE satellite might change that in the future.

**Response:** Thank you for your comment. We added some words addressing the resolution of CloudSat and the future EarthCARE mission: “Satellites with an active remote sensing payload, e.g. the Cloud-Aerosol Lidar and Infrared Pathfinder Satellite Observation (CALIPSO; Winker et al., 2010) and CloudSat (Stephens et al., 2002) provide vertically highly resolved measurements of aerosol and cloud properties with nearly global coverage (Liu et al., 2008; Medeiros et al., 2010). Up to now, studies based on active remote-sensing satellite data with focus on cloud macro-physical properties concentrated on long-term and large-scale observations, e.g. low-latitude boundary layer cloud cover (Medeiros et al., 2010), as the sensitivity of those instruments is too low to detect shallow marine clouds with high resolution. The upcoming EarthCARE (Earth Clouds, Aerosols and Radiation Explorer) satellite mission which is planned to be launched in 2021 (Illingworth et al., 2015) might change that in future due to its unique payload: a combination of lidar (Atmospheric Lidar - ATLID) and Cloud Profiling Radar (CPR).”

**Comment:** Page 3, Figure 1: You show all flights in the figure, including the Ferry flights. Did you use the measurements during the ferry flights for your study? If this is the case, then you cannot call the studied clouds “trade wind clouds” anymore, because the ferry flights were outside of the trade wind region. Maybe you should only show the area and the flight paths, which you took for your analysis.

**Response:** We clarified this in the revised manuscript and gave an explanation. Furthermore, we revised the map-plot showing HALO-flight tracks. We only plotted flight tracks used in this study and zoomed into the trade-wind region. This makes it much clearer for the reader: “Data-sets obtained during the NARVAL-II transfer flights from and to Germany (i.e. RF1 30 and RF10) are not included in the analysis, because most measurements took place outside the trades and cirrus fields were present inside the trades. RF5 and 7 are excluded as well since cirrus fields covered most of the research area during RF5 and RF7’s objective was to cross the Inter Tropical Convergence Zone (ITCZ) for several times. NARVAL-I lidar data (obtained from measurements inside the trades (10 to 20° N)) are used to compare obtained results from the 2016 summer season to the 2013 winter season.”

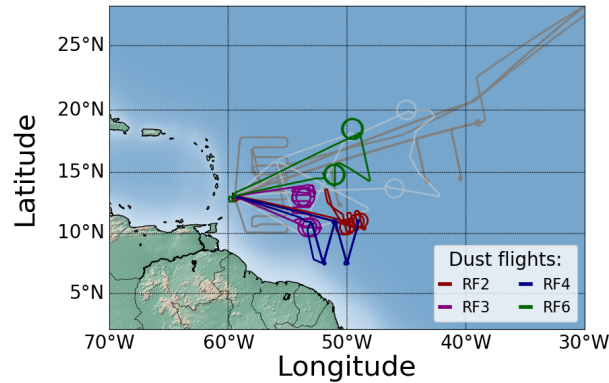

Figure 4: NARVAL research flight tracks: NARVAL-II dust-flights (color coded), NARVAL-II dust-free flights (light-grey), NARVAL-I (dark-grey).

**Comment:** Page 3, Line 1-2: The sensitivity of the HAMP-radar is not high enough to detect shallow cumulus clouds. In comparison to the lidar measurements it should miss a lot of these smaller clouds. Do you use the radar in your study at all? It sounds like you do, because you say: including radar and lidar systems - probably the two most important instruments for vertically highly resolved measurements of aerosol and cloud properties.  
 5 Maybe you can add a sentence to explain why you only analyze the lidar measurements.

**Response:** We do not use radar data in the analysis and modified the paragraph as follows: "For this purpose it was equipped with a combined active and passive remote sensing payload, including a radar and a lidar system... The sensitivity of the radar system is not high enough to detect small-scale shallow cumulus clouds as well as aerosol layers. This is why this study only focuses on the retrieval of horizontal and vertical distributions of both aerosols and clouds from lidar measurements performed during the NARVAL field campaigns to study the impact of the SAL on subjacent marine cloud macro-physical properties (i.e. cloud fraction, cloud top height, cloud length)."  
 10

**Comment:** Page 3, Line 3-5: Here you mention that your study is focusing only on NARVAL-II. The abstract gives the impression that you focus on NARVAL-South and NARVAL-II. The reader might wonder why you don't look into the campaign from 2013?  
 15

**Response:** We clarified that by adding the NARVAL-I data set to the analysis (explained in detail in section 'Major comments concerning the data set').

**Comment:** Page 3, Line 15: Replace "out" by "eastward".  
 20

**Response:** We replaced the word: "...HALO was operated eastward of Barbados."

**Comment:** Page 3, Line 16: "cruising altitude of 15.5 km" Under empty (no crew and less fuel) conditions? What was the highest altitude during the campaign?

**Response:** According to the official webpage, HALO has a certified ceiling of 15.545 km altitude. We also added the highest altitudes during the NARVAL campaign series: "The aircraft has a maximum range of more than 12000 km and certified ceiling of 15.545 km altitude (max altitudes: NARVAL-I: ~14 km; NARVAL-II: ~15 km)."  
 25

**Comment:** Page 3, Line 18: What does SMART stand for?  
 30

**Response:** It stands for "Spectral Modular Airborne Radiation measurement sysTem". We added this information to the revised manuscript.

**Comment:** Page 4, Table 1: You mention the research objectives, but never mention the divergence flights, which were a big part of the campaign. For example, during flight 3 and 6 (see Stevens et al., 2019; Table 2). That's why the flight patterns show so many circles.  
 35

**Response:** Of course divergence flights were a big part of the campaign. We added two sentences to address this point: "Moreover, studying the large scale atmospheric divergence was a main objective of the campaign"

(Bony and Stevens, 2019). This is why the flight patterns show many circles, i.e. during RF2, 3, 6-8 and 10.”

**Comment:** Page 4, Line 1: How much is ”a large number of dropsondes”? During NARVAL-II 218 dropsondes were launched from HALO (see Stevens et al., 2019).

5 **Response:** We added the number of deployed sondes ”Additionally a large number of dropsondes were deployed to get information on the atmospheric state (NARVAL-I: 71; NARVAL-II: 218).”

**Comment:** Page 5, Line 3: ”resolution of approximately 200 m” is important for the identification of the cloud size. Later, you look at clouds with a cloud length smaller than 500 m (Fig. 6). Does it mean that these clouds  
10 consider only 2 pixels/data points?

**Response:** We clarified the sampling frequency of WALES in the chapter ”The WALES instrument” and show that small clouds are detected on the basis of averaged measurements with even higher resolution: ”The temporal resolution of the raw data is 5 Hz and is averaged to 1 Hz for a better signal-to noise ratio. This results in a horizontal resolution of approximately 200 m at typical aircraft speed.”

15 **Comment:** Page 7, Figure 3: All your labels use a ”/” to separate the Label text from the unit. Why not just writing the units in brackets ”[°]”, like you did it in Table 1 for UTC?

**Response:** We changed the labeling of all graphs from slashes to brackets.

20 **Comment:** Page 7, Figure 3: You could use two different colors for the flight track to mark the dust and no dust regions.

**Response:** To highlight dust-laden and dust-free regions we plotted the flight track on top of MODIS real-color and and aerosol optical depth imagery. The two different regimes can now be easily distinguished by the reader. Additionally we color-coded launched dropsondes: sondes in dust-free regimes (blue); sondes in  
25 dust-laden regimes (red). The new figure is described in the revised manuscript as follows: ”Whereas the first pair of circles was performed over a heavily dust-laden region in the southern part of the flight track, the second pair was performed in the northern part over an almost dust-free region. This is also seen in MODIS aerosol optical depth imagery at 13:40 UTC in Figure 4 (right) where the region around the southern circle shows a maximum aerosol optical depth greater 0.4.”

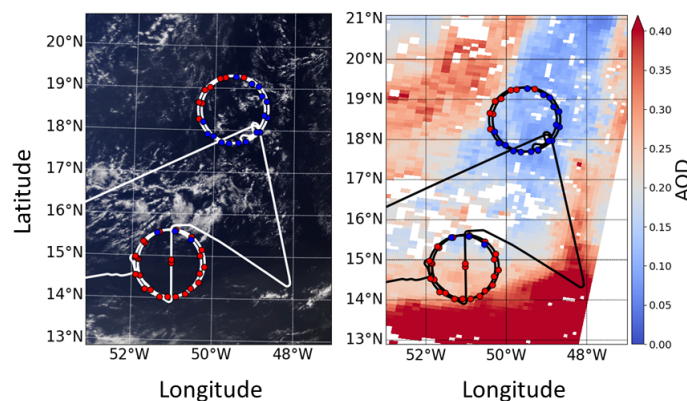

Figure 5: Flighttrack of RF6 on 19 Aug 2016 on top of the Terra-MODIS (MODerate-resolution Imaging Spectroradiometer) true color image (left) and the MODIS aerosol optical depth (AOD) product (right) at 13:40 UTC. Launched dropsondes are marked by colored dots (red dots: mineral dust laden regions, blue: dust free regions).

30 **Comment:** Page 8, Line 5-6: Why were only RF4 and RF6 chosen to measure in dust free regions? Wouldn't it be useful to also take RF1, RF5 and RF7 to RF10 into account for measuring in dust free regions?

**Response:** We clarified this in the revised manuscript and gave an explanation: Data-sets obtained during the NARVAL-II transfer flights from and to Germany (i.e. RF1 30 and RF10) are not included in the analysis, because most measurements took place outside the trades and cirrus fields were present inside the trades. RF5



and 7 are excluded as well since cirrus fields covered most of the research area during RF5 and RF7's objective was to cross the Inter Tropical Convergence Zone (ITCZ) for several times.

**Comment:** Page 8, Line 16: "far south" How far?

5 **Response:** We added this information as follows: The Intertropical Convergence Zone (ITCZ) and associated deep convection were located  $\sim 550$  km south of the flight track at around  $10^\circ\text{N}$  and it is not expected to have an influence of the ITCZ on our analysis.

10 **Comment:** Page 8, Line 24: Why are the trajectories not shown here? You could add another panel to Figure 3 and show the trajectories.

**Response:** We followed your suggestion and added a figure which shows the calculated trajectories for all four research flights leading over Saharan dust layers on a map as well as a function of time and altitude. Moreover, we addressed the new figure in the revised manuscript: The Saharan origin of the observed dust layers is verified using 10-day backward-trajectories with starting points at the center of the respective Saharan air layers (Figure 3). All observed dust layers traveled for 5 to 10 days from the Adrar-Hoggar-Air region to the measurement location over the western North Atlantic Ocean. In central Africa the SAL is formed by intense surface heating and dry convection which mixes dust particles to altitudes of up to 6 km (Gamo, 1996).

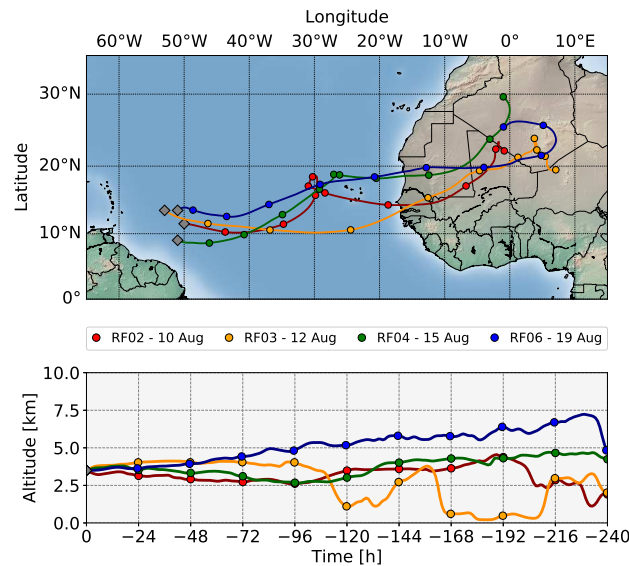

Figure 6: 10-day backward trajectories with starting points at the center of the respective Saharan air layers for the four NARVAL-II research flights leading over Saharan dust-laden trade wind regions (RF2, 3, 4 and 6).

**Comment:** Page 8, Line 28: Maybe you can mark the dropsonde locations in Figure 3. Page 9, Figure 4: The upper left panel should be labeled as "D1", right?

20 **Comment:** Page 9, Figure 4: Why are you focusing only on two single dropsondes from each circle? It looks a little bit like cherry picking. I would suggest to average over all dropsondes for each circle.

**Response to both comments:** We averaged all sampled dropsonde-profiles in dust-laden and dust-free regions (explained in detail in section 'Major comments concerning the analysis'), marked dropsonde locations on top of MODIS real-color as well as aerosol-optical depth imagery (shown above) and revised the mentioned figure.

25 **Comment:** Page 9, Line 67: You write "CF is 20% in dust-free regions. In the SAL-region however, CF decreases to 11% (including the clouds developing at the edges of the dust layer)", which gives the impression that only dust is causing the differences. You should clarify that.

30 **Comment:** Page 10, Line 12 : "However, in dust free regions cloud top heights reach almost twice as high and up to 2 km." This is not a direct effect from the dust. When you look at Figure 4 in Stevens et al. (2019), you see that the vertical velocities are different. Updrafts in the region of the NE circle cause the higher cloud top heights.



**Response to both comments:** Within the revised manuscript we highlight the differences in dynamics by discussing the major findings of the recently published paper by Bony and Stevens (2019) and Stevens et al. (2019) and relating regions of up-welling and down-welling vertical motion to dust-free and dust-laden regimes. Additionally, we give an revised, extended and more profound discussion of differences in meteorological parameters in the two regimes in section 3.2. (addressed in section 'Major comments' of Referee #2): However, in dust free regions cloud top heights reach almost twice as high and up to 2 km. Divergence measurements discussed by Bony and Stevens (2019) and Stevens et al. (2019) show that dynamical properties in the two regions are different as well. They found that MBL-vertical velocity in the dust-free regime is directed upwards and could explain the observed increased cloud top heights. For an investigation of the question why vertical wind speeds, cloud tops and cloud fractions are higher in the dust-free regime than in the SAL-regime differences in meteorological parameters between SAL-regions and dust-free regions are analyzed by discussing mean profiles of all dropsonde measurements in the respective regions.

**Comment:** Page 11, Line 1 -2: Your conclusion that "less and shallower clouds" are present in Saharan dust laden trade wind regions" is based only on Figure 5 and the CF. I think this conclusion need more fundamental explanation. For example, Figure 5 shows only a higher CTH fraction for dust laden regions in an altitude between 0.5 and 1.5 km. But why are there higher CTH fractions for dust free regions in all other altitude bins? The dust layer is in all flights between 2 and 6 km altitude. For this reason, you would also expect a higher CTH fraction in dust laden regions between 1.5 and 2 km. I am also wondering about the clouds between 0 and 0.5 km. Are these caused by precipitation? Usually, you would expect a cloud base height at ~700m in the trade wind region.

**Response:** Figure 5 shows the cloud top height fractions in the respective regimes as a function of relative frequency. We think this comment is probably a misunderstanding, since both shown distributions are independent from each other and just show that cloud tops detected in dust-free regions show a broader distribution and reach higher up into the atmosphere than cloud tops in dust-laden regions. Those cloud tops were never observed to reach higher than 2.5 km altitude during the whole field campaign. As an example, more than 60% of all detected cloud tops in dust-laden regimes (not of the total amount of observed cloud tops in both regimes) were observed in the interval from 0.5 to 1 km altitude.

Furthermore, we added two sentences that explain the existence of cloud top heights in the lowermost 500 m. In our opinion those low CTHs are not representing precipitation, because precipitating clouds in general are deeper: Several clouds were also detected in the lowermost 0.5 km of the atmosphere (~1 %). Most likely those clouds are evolving or dissipating clouds at the bottom of the cloud layer."

**Comment:** Page 13, Line 8: Replace "flight" by "flights".

**Response:** We replaced the word.

**Comment:** Page 13, Line 12: It looks like you can replace 1.6 km by 1.8 km.

**Response:** Thank you for the comment. We corrected the number.

**Comment:** Page 15, Line 5 -7: You write before this sentence that the main player is a "dry anomaly". And then you say that "Saharan air layers were not found coming along with dry anomalies". For this reason, I think you cannot use this study to explain your results.

**Response:** We clarified that and made clear that we cannot explain our found results with findings of this specific study. We highlighted that we found enhanced concentrations of water vapor in SAL-altitudes compared to the dry free troposphere (which has already been observed, e.g. by Jung et al. (2013)) and that we also find a suppressing characteristic of the SAL on convection: "These results are in good agreement with results of previous satellite remote sensing studies (Dunion and Velden, 2004) and model studies (Wong and Dessler, 2005; Stephens et al., 2004) which also suggest a convection-suppressing characteristic of the SAL. Some of those studies suggest that the main player of the suppression characteristic is a dry anomaly in SAL-altitudes. However, all observed long-range transported Saharan air layers during NARVAL-II were not found to come along with dry anomalies, but were rather showing enhanced humidities (compared to the surrounding dry free trade wind atmosphere) in the range from 2 to 4  $gkg^{-1}$ . Saharan air layers frequently show water vapor mixing ratios in this range over Africa (Marsham et al., 2008). During the transport towards the Caribbean the SAL conserves the received moisture and takes up additional one from upwelling surface fluxes during transport (Jung et al., 2013). Nevertheless, a suppressing characteristic of the SAL on subjacent marine clouds is evident as well."

**Comment:** Page 15, Line 19 -21: As a future study you could mention the upcoming EUREC4A campaign.

**Response:** We followed your suggestion and mentioned EUREC<sup>4</sup>A in section '*Summary and Conclusion*':  
"Further reaching questions regarding changes in radiation caused by the dust layer and its moisture, changes  
in the general circulation patterns or the settling of dust particles into the cloud layer (Gross et al., 2016) could  
not be addressed within the present work and are left to future studies and field campaigns, e.g. the upcoming  
5 EUREC<sup>4</sup>A field campaign (Elucidating the Role of Clouds-Circulation Coupling in Climate) in early 2020  
(Bony et al., 2017)."

**Comment:** Page 19, Line 21: Replace "Klingenbiel" by "Klingeziel" Page 19, Line 22: Paper is already online  
and has a DOI.

10 **Response:** We rectified the transposed combination of letters and added the DOI.

# Reply to Anonymous Referee #1

## General Comments

**Comment:** Reading through the paper suggests that the aerosols are causing the differences in cloudiness but how can an elevated dust layer imprint itself on the lower laying clouds? Furthermore, what is not quite clear to me is how the meteorology during periods of SAL differs to periods without dust and how this might influence the cloudiness. Other studies (e.g. Lonitz et al. 2015) have shown, that e.g. slight differences in relative humidity can also cause differences in trade wind clouds to a comparable level as differences in aerosol load can do. Also effects of wind should be discussed, as done by Nuijens and Stevens in 2012 using Large Eddy Simulations. Having access to meteorological data from the dropsondes, I would like to see that the differences in relative humidity and wind are analysed in greater depth (not just shown as done in Fig. 4 for humidity) and a discussion about if dust or the meteorology associated with dust could potentially cause the observed changes in cloudiness.

**Response:** We follow your suggestion and analyzed dropsonde data in greater depth. In the revised manuscript we averaged profiles from all dropsondes launched in dust-laden and dust-free regimes and discussed and explained measured differences (see major comments of Referee #2). We discussed hypotheses how boundary layer wind speed and humidity could cause changes in marine boundary layer cloudiness (as shown in Nuijens et al. (2009), Nuijens and Stevens et al. (2012) and Lonitz et al. (2015)) and found that there is no significant difference in surface wind speed and boundary layer humidity between both regimes, which could explain upwelling vertical motion and cloud development. Furthermore, we highlighted changes in meteorology (i.e. additional inversions) that come along with an elevated dust layer, which could potentially explain the observed changes in cloudiness. Summed up, the SAL potentially modifies atmospheric stability and radiative transfer and appears to have a suppressing impact on convection below. All these changes and additions are marked up in the appended revised manuscript.

## Specific Comments

**Comment:** Introduction: Please elaborate in more detail how dust and the formation of cloud interact, how the aerosol could alter clouds and why dust can act as a good CCN.

**Response:** In the revised manuscript we described how dust and the formation of cloud may interact, how aerosol could alter clouds and why dust can act as a good CCN: "During its long-range transport the SAL affects the Earth's radiation budget in two different ways. First, mineral dust aerosols may act as cloud condensation nuclei (CCN) or ice nucleating particles (INPs) in water and ice clouds, hence influencing cloud microphysics - this effect is referred to as 'indirect' mineral dust aerosol effect (Twomey, 1974, 1977; Karydis et al., 2011; Begué et al., 2015; DeMott et al., 2015; Boose et al., 2016). Thus, cloud formation, lifetime and occurrence as well as precipitation and ice formation may be manipulated by Saharan dust deposition into the cloud layer (Mahowald and Kiehl, 2003; Seifert et al. 2010). Secondly, dust particles absorb and scatter solar radiation during daytime and emit thermal radiation during nighttime. This so-called 'direct' mineral dust radiative effect modifies the atmospheric temperature profile and impacts the evolution of atmospheric stratification, sea surface temperature as well as cloud development (Carlson and Benjamin, 1980; Lau and Kim, 2007)."

**Comment:** p2, l18/19 is not true. Lonitz et al 2015 (<https://journals.ametsoc.org/doi/10.1175/JASD-14-0348.1>) have studied this.

**Response:** Thank you very much for your reference to Lonitz et al. (2015). We have read their paper and used it as a reference for the Introduction: "Although the interaction of Saharan dust layers and clouds has already been a focus during these campaigns and other studies, e.g. by investigating glaciation of mixed-phase clouds (Ansmann et al, 2008; Seifert et al., 2010) or by exploring the relationship between shallow cumulus precipitation rates and radar measurements in dust-laden and dust-free environments (Lonitz et al., 2015), the impact of long-range transported elevated Saharan dust on cloud macro-physical properties of subjacent trade wind clouds has not been studied."

**Comment:** Section 2.4: Do you also check if the neighboring cloudy profiles have the cloud in similar height levels? If not, this might have an impact on the results shown in section 3.3.

**Response:** We checked whether this is the case. However, almost every cloud shows cloud tops in similar altitudes and due to the large overall number of detected clouds no impact on derived statistics is seen.

**Comment:** Figure 4 and p15, l 5-7: Was the relative humidity measured by the dropsondes or derived by the lidar? How does dry Saharan air layers relate to an increase in humidity?

**Response:** Moisture profiles were measured by both dropsondes and the lidar instrument and agree within a few percent, which is in the order of measurement uncertainties (Stevens et al., 2017).

5 In the revised manuscript, we addressed that long-range transported Saharan Air Layers are known to show an increased amount of water vapor compared to the dry free troposphere: "Moreover, enhanced amounts of water vapor are observed inside the long-range transported SAL. Relative humidity and water vapor mass mixing ratio show an increase of  $2 \text{ g kg}^{-1}$  in SAL regions compared to the dust-free trade wind region. Such an increase has already been observed by (Jung et al., 2013). From radiosonde measurements they found that the  
10 SAL transports moisture from Africa towards the Caribbean and gets moistened during transport by upwelling surface fluxes."

Citation: Stevens, B., Brogniez, H., Kiemle, C., Lacour, J.-L., Crevoisier, C., and Kiliari, J.: Structure and Dynamical Influence of Water Vapor in the Lower Tropical Troposphere, *Surv. Geophys.*, 38, 13711397,  
15 <https://doi.org/10.1007/s10712-017-9420-8>, 2017.

**Comment:** P15, l14/15: How does the suppression work. Please elaborate.

**Response:** We deleted the sentences and added some sentences that explain how optically and vertically thicker dust layers could potentially suppress the evolution of higher reaching convection: "These results indicate that  
20 optically and vertically thick elevated Saharan dust layers have a greater suppressing effect on convection below than optically and vertically thin layers. Dropsonde profiles of potential temperature  $\Theta$  and the squared Brunt-Väisälä frequency  $N^2$  in dust-laden trade wind regions indicate two inversions at the bottom and the top of the SAL which additionally counteract convective development. Those two SAL-related additional inversion layers are an explanation why there are less and shallower clouds in SAL regions and why thick and pronounced dust  
25 layers introduce a more stable stratification to the trade wind regime than less pronounced ones." Additionally we discussed hypotheses on how elevated and long-range transported Saharan dust layers and the associated change in meteorological parameters can have an impact on cloud-development below throughout the revised manuscript (discussed in author comments above).

## 30 Technical Comments

**Comment:** Often the word "underneath" is used instead of "below", e.g. p2 l8, caption of figure 7.

**Response:** We replaced the word "underneath" with "below" throughout the text.

**Comment:** P2, l35: Citation incorrect: Stevens et al 2019.

35 **Response:** The citation is updated in the revised manuscript. Stevens et al. (2019) is already published and not subject of the review-process anymore.

**Comment:** P10, l19: "first" instead of "fist"

**Response:** We corrected that.

40 **Comment:** Sec 3.3.2: How do you derive the cloud length in kilometers? My guess is that you assume some relationship between the speed of the aircraft and time?!

**Response:** Cloud (gap) lengths are calculated using aircraft geolocation and mean cloud top height using the haversine formula. We clarified that in the revised manuscript: For the calculation of cloud lengths along the  
45 flight path neighboring cloud-flagged vertical profiles are connected. The cloud length is then determined as a function of the respective geolocations (aircraft latitude and longitude) and CTH using the haversine formula.

Besides changes which were made by reason of referee comments, some small textual and grammatical corrections were made during proofreading, with the most prominent one being an additional  
50 column in Table 1 showing the total duration of the research flights. All made changes can be found in the attached marked up manuscript version.

# Cloud macro-physical properties in Saharan dust laden and dust free North Atlantic trade wind regimes: A lidar case study

Manuel Gutleben<sup>1</sup>, Silke Groß<sup>1</sup>, and Martin Wirth<sup>1</sup>

<sup>1</sup>Institut für Physik der Atmosphäre, Deutsches Zentrum für Luft- und Raumfahrt (DLR), 82234 Weßling, Germany.

**Correspondence:** Manuel Gutleben (manuel.gutleben@dlr.de)

**Abstract.** Saharan dust is known to have an important impact on the atmospheric radiation budget, both directly and indirectly by changing cloud properties. However, up to now it is still an open question if elevated and long-range transported Saharan dust layers have an effect on subjacent marine trade wind cloud occurrence. Shallow trade wind clouds have a significant impact on the Earth's radiation budget ~~and still introduce~~ as well as on total tropical precipitation and marine boundary layer dynamics and are still introducing large uncertainties in climate sensitivity estimates, because of their poor representation in climate models. The Next-generation Aircraft ~~Remote-Sensing for Validation~~ Remote-sensing for VALidation studies (NARVAL) aimed at providing a better understanding of shallow marine trade wind clouds and their interplay with long-range transported elevated Saharan dust layers. Two airborne campaigns were conducted - the first one in December 2013 and the second one in August 2016; the latter one during the peak season of transatlantic Saharan dust transport. Airborne lidar measurements in the vicinity of Barbados performed during the second ~~field~~ campaign are used to investigate possible differences between shallow marine cloud macro-physical properties in dust-free regions and regions comprising elevated Saharan dust layers. These observations are then also compared to cloud-macrophysical properties derived from measurements during the first campaign in the dust-free winter-season. The cloud top height distribution derived in dust-laden regions differs from the one derived in dust-free regions and indicates that ~~clouds are shallower and convective development is suppressed~~ there are less and shallower clouds in the dust-laden than in dust-free trades. Furthermore, regions comprising elevated Saharan dust layers show a larger fraction of small clouds and larger cloud free regions, compared to dust-free regions. The cloud fraction in ~~dusty regions~~ the dust-laden summer trades is only 14 % compared to a fraction of 31 % and 37 % in dust-free ~~region~~ trades and the winter season. Dropsonde-measurements show that long-range transported Saharan dust layers come along with two additional inversions which counteract convective development, stabilize the stratification and may lead to a decrease of convection in those areas. Moreover, a decreasing trend of cloud fractions and cloud top heights with increasing dust layer vertical extent as well as aerosol optical depth is found.

## 1 Introduction

Saharan dust represents one of the main contributors to the atmosphere's primary aerosol load. Huneus et al. (2011) estimate that every year 400 to 1000 Tg of Saharan mineral dust are mobilized and transported over the North Atlantic Ocean within an elevated atmospheric layer: the so-called Saharan air layer (SAL; Carlson and Prospero (1972), Prospero and Carlson (1972)).

Transatlantic Saharan dust transport shows its maximum during the northern hemispheric summer (Prospero and Lamb, 2003). In this period dust particles are frequently transported westwards and arrive in the Caribbean after approximately 5 days (transport speed:  $\sim 1000 \text{ km d}^{-1}$  (Huang et al., 2010)). Sometimes Saharan dust is even transported as far as the coast of Mexico and Florida (Colarco (2003); Wong et al. (2006)).(Colarco, 2003; Wong et al., 2006).

5 During its long-range transport the SAL affects the Earth's radiation budget in two different ways. ~~On the one hand, the direct dust radiative effect modifies atmospheric stability, sea surface temperature and hence cloud development (Carlson and Benjamin (1980); Wong and Dessler (2005); Lau and Kim (2007)) . On the other hand, cloud~~ First, mineral dust aerosols may act as cloud condensation nuclei (CCN) or ice nucleating particles (INPs) in water and ice clouds, hence influencing cloud microphysics - this effect is referred to as 'indirect' mineral dust aerosol effect

10 (Twomey, 1974, 1977; Karydis et al., 2011; Bègue et al., 2015; DeMott et al., 2015; Boose et al., 2016). Thus, cloud formation, lifetime and occurrence as well as precipitation and ice formation may be manipulated by Saharan dust deposition into the cloud layer (Mahowald and Kiehl (2003), Seifert et al. (2010)). A theoretical study by Wong and Dessler (2005) suggests a possible suppressing effect of the SAL on deep convection, by showing that the convection barrier increases with SAL optical depth, especially over the eastern North Atlantic Ocean. They argue that the warmer and dryer air associated with the SAL rises the

15 lifting condensation level (Mahowald and Kiehl, 2003; Seifert et al., 2010). Secondly, dust particles absorb and scatter solar radiation during daytime and emit thermal radiation during nighttime. This so-called 'direct' mineral dust radiative effect modifies the atmospheric temperature profile and impacts the evolution of atmospheric stratification, sea surface temperature as well as ~~the level of free convection and therefore increases the energetic barrier to convection. As a result, the occurrence of deep convection is reduced. These findings also suggest a suppression of shallow marine cloud development due to long-range~~

20 ~~transported Saharan dust. However, observations of suppressed marine cloudiness underneath long-range transported layers of Saharan dust over the Atlantic Ocean are missing so far~~ cloud development (Carlson and Benjamin, 1980; Lau and Kim, 2007).

A large number of field campaigns aimed at getting a better understanding of the SAL as well as its interaction with clouds. The most extensive measurement series has probably been performed within the Saharan Mineral Dust Experiment series SAMUM-1 (Heintzenberg, 2009) and SAMUM-2 (Ansmann et al., 2011) followed by the Saharan Aerosol Long-range Transport and Aerosol-Cloud-Interaction Experiment (~~SALTRACE~~, ~~Weinzierl et al. (2017))~~ SALTRACE (Weinzierl et al., 2017).

25 Within this series of closure experiments, ~~including which included~~ airborne and ground-based in-situ and remote sensing measurements as well as modeling efforts, micro-physical, chemical and radiative properties of dust were investigated at the beginning of its long-range transport near ~~dust the~~ source regions as well as after its long-range transport in the vicinity of Barbados. Although the interaction of Saharan dust layers and clouds has already been a focus during these campaigns and

30 other studies, e.g. by investigating glaciation of mixed-phase clouds (Ansmann et al., 2008; Seifert et al., 2010) or by exploring the relationship between shallow cumulus precipitation rates and radar measurements in dust-laden and dust-free environments (Lonitz et al., 2015), the impact of long-range transported elevated Saharan dust on cloud macro-physical properties of sub-jacent trade wind ~~cloud development~~ clouds has not been studied.

Due to their occurrence in at remote locations over the subtropical North Atlantic Ocean, it is difficult to study undisturbed

35 trade wind cloud regimes and their interplay with Saharan air layers in the course of field campaigns with limited spatial

coverage. Satellite measurements can of course provide information in these regions. Dunion and Velden (2004) used Geostationary Operational Environmental Satellite (GOES) infrared imagery to study the structural and dynamical characteristics of the SAL. ~~They also suggest convective inhibition and associated reduction of deep convection due to the elevated SAL.~~ Wong and Dessler (2005) used MODIS (MODerate-resolution Imaging Spectroradiometer) satellite data to study the effect of the SAL on deep convection. Both studies found a suppressing effect of the SAL on deep convection and tropical cyclone activity. Wong and Dessler (2005) suggest that the convection barrier increases with SAL optical depth, especially over the eastern North Atlantic Ocean. They argue that the warmer and dryer air associated with the SAL rises the lifting condensation level as well as the level of free convection and therefore increases the energetic barrier to convection. These findings also suggest a suppression of shallow marine cloud development due to long-range transported Saharan dust. Nevertheless, vertically resolved observations of suppressed marine cloudiness below long-range transported layers of Saharan dust over the Atlantic Ocean are missing so far.

Satellites with an active remote sensing payload, e.g. the Cloud-Aerosol Lidar and Infrared Pathfinder Satellite Observation (CALIPSO; (Winker et al., 2010)) and CloudSat (Stephens et al., 2002) additionally provide vertically highly resolved measurements of aerosol and cloud properties with nearly global coverage (Liu et al., 2008; Medeiros et al., 2010). However up to now, studies based on active remote-sensing satellite data with focus on cloud macro-physical properties concentrated on long-term and large-scale observations, e.g. low-latitude boundary layer cloud cover (Medeiros et al., 2010). ~~From these observations it is also~~, as the sensitivity of those instruments is too low to detect shallow marine clouds with high resolution. The upcoming EarthCARE (Earth Clouds, Aerosols and Radiation Explorer) satellite mission which is planned to be launched in 2021 (Illingworth et al., 2015) might change that in future due to its unique payload: a combination of lidar (Atmospheric Lidar - ATLID) and Cloud Profiling Radar (CPR). However, from spaceborne remote sensing in general it is hard to get an accurate aerosol retrieval during daylight conditions, which makes it difficult to study the interplay of SAL and clouds.

Besides satellite observations, measurements from long range research aircraft provide a valuable alternative to study the problem at hand. One such platform is the German High Altitude and LOng range research aircraft HALO (Krautstrunk and Giez, 2012). With HALO it is possible to perform measurements over both SAL-influenced and clear trade wind regions within the very same flight. During the ~~NARVAL-II field campaign~~ NARVAL field campaigns (Next-generation Aircraft Remote-Sensing for Validation Studies-VALidation Studies) HALO was used as a flying aerosol and cloud observatory (Stevens et al., 2018, submitted)(Stevens et al., 2019). For this purpose it was equipped with a combined active and passive remote sensing payload, including ~~radar and lidar systems – probably the two most important instruments for vertically highly resolved measurements of aerosol and cloud properties~~a radar and a lidar system. In addition, dropsondes were deployed to get information on the thermodynamic state of the atmosphere. ~~This study is focused~~The sensitivity of the radar system is not high enough to detect small-scale shallow cumulus clouds as well as aerosol layers. This is why this study only focuses on the retrieval of horizontal and vertical distributions of both aerosols and clouds from lidar measurements performed during the NARVAL field campaigns to study the impact of the SAL on subjacent marine cloud macro-physical properties (i.e. cloud fraction, cloud top height, cloud length)from lidar measurements performed in the course of NARVAL-II.

Chapter 2 gives an overview of the ~~NARVAL-II field campaign~~ NARVAL campaign series and a description of the used



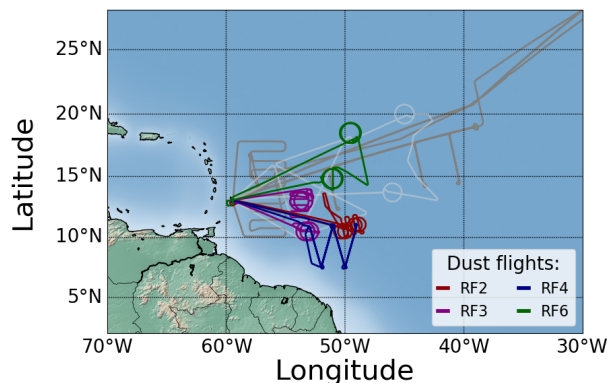

**Figure 1.** NARVAL-NARVAL research flight tracks: NARVAL-II dust-flights (color coded with date information). Arrows indicate the locations of Grantley Adams International Airport, NARVAL-II dust-free flights (FBP) and Airport Oberpfaffenhofen, NARVAL-I (EDMO) (dark-grey).

employed lidar instrument. In Chapter 3 the general measurement situation during NARVAL-II-NARVAL is discussed and a detailed overview of the results is given. Moreover, the results are discussed and related to findings of other studies. A short summary along with the conclusion of this paper is presented in Chapter 4.

## 2 Instruments and methods

### 5 2.1 NARVAL-NARVAL

In summer December 2013 and August 2016 the Next-generation Aircraft Remote-Sensing for Validation Studies (NARVAL-; Stevens et al. (2018, submitted) VALidation Studies (NARVAL; Klepp et al. (2014); Stevens et al. (2019)) were conducted to study the occurrence and formation of marine clouds during the subtropical North Atlantic dry and wet season. As Saharan dust transportation over the Atlantic Ocean occurs quite frequently in northern hemispheric summer months, measurements  
10 were also dedicated to investigate the influence of the SAL on underlying shallow trade wind clouds.

During NARVAL-II both NARVAL-I-South (here for simplicity referred to as NARVAL-I) and NARVAL-II, HALO was operated out eastward of Barbados. The aircraft has a maximum range of more than 12000 km and a maximum cruising altitude of ~15.5 km. It certified ceiling of 15.545 km altitude (max altitudes: NARVAL-I: ~14 km; NARVAL-II: ~15 km). During both campaigns it was equipped with a combined active and passive remote sensing payload including the lidar system WALES  
15 (Wirth et al., 2009), a 35.2 GHz cloud radar (Ewald et al., 2018, in discussion) (Ewald et al., 2019), microwave radiometers (Mech et al., 2014), a hyper spectral imager (Ewald et al., 2016) and the and the Spectral Modular Airborne Radiation measurement System SMART instrument for radiation measurements (Wendisch et al., 2001). Additionally a large number of

**Table 1.** Overview of the conducted research flights during NARVAL-II in 2016 including dates, times of take-off and landing, [total duration](#) as well as research objectives and flight hours in SAL regions (all times given in UTC - note: Atlantic Standard Time = UTC-4; TBPB: Grantley Adams International Airport; EDMO: Airport Oberpfaffenhofen).

| Flight No. | Date   | Take-off [UTC] | Landing [UTC] | <a href="#">Total duration</a>                       | Research objective                                 | Dust    |
|------------|--------|----------------|---------------|------------------------------------------------------|----------------------------------------------------|---------|
| RF1        | 08 Aug | 08:12 (EDMO)   | 18:51 (TBPB)  | <a href="#">10:39 h</a>                              | Transfer flight                                    | -       |
| RF2        | 10 Aug | 11:52 (TBPB)   | 20:02 (TBPB)  | <a href="#">08:10 h</a>                              | Dust/no dust flight <a href="#">and divergence</a> | ~ 2.3 h |
| RF3        | 12 Aug | 11:43 (TBPB)   | 19:37 (TBPB)  | <del>Dust flight</del> <a href="#">07:54 h</a>       | <a href="#">Dust flight/Divergence</a>             | ~ 6.5 h |
| RF4        | 15 Aug | 11:47 (TBPB)   | 19:46 (TBPB)  | <a href="#">07:59 h</a>                              | Dust/no dust flight                                | ~ 2.7 h |
| RF5        | 17 Aug | 14:47 (TBPB)   | 23:08 (TBPB)  | <a href="#">08:21 h</a>                              | Satellite validation                               | -       |
| RF6        | 19 Aug | 12:28 (TBPB)   | 20:52 (TBPB)  | <a href="#">08:24 h</a>                              | Dust/no dust flight <a href="#">and divergence</a> | ~ 4.5 h |
| RF7        | 22 Aug | 13:16 (TBPB)   | 20:57 (TBPB)  | <del>ITCZ measurements</del> <a href="#">07:41 h</a> | <a href="#">ITCZ/Divergence</a>                    | -       |
| RF8        | 24 Aug | 12:43 (TBPB)   | 20:55 (TBPB)  | <a href="#">08:12 h</a>                              | Tropical storm Garcon/ <a href="#">Divergence</a>  | -       |
| RF9        | 26 Aug | 13:43 (TBPB)   | 20:54 (TBPB)  | <a href="#">07:11 h</a>                              | Tropical storm Garcon                              | -       |
| RF10       | 30 Aug | 09:42 (TBPB)   | 19:52 (EDMO)  | <del>Transfer flight</del> <a href="#">10:10 h</a>   | <a href="#">Transfer flight/Divergence</a>         | -       |

dropsondes were deployed to get information on the atmospheric state ([NARVAL-I: 71; NARVAL-II: 218](#)).

From 8 to 30 August ~~2018~~2016, 10 research flights (RF) comprising a total of 85 flight hours were conducted (Figure 1). During four of those flights, flight patterns were specifically designed for an investigation of Saharan air layers and their impact on subjacent marine trade wind cloud regimes. [Moreover, studying the large scale atmospheric divergence was a main objective of the campaign \(Bony and Stevens, 2019\). This is why the flight patterns show many circles, i.e during RF2, 3, 6-8 and 10.](#) Table 1 gives a detailed overview of all performed [NARVAL-II](#) research flights including [the](#) main research objectives.

This study focuses on the dust-laden [research flights](#) ~~RF2 to~~, ~~RF3~~, ~~RF4~~ and ~~RF6~~ ~~of~~ [NARVAL-II](#). [Cloud macrophysical properties measured during those flights are compared to properties observed during dust-free NARVAL-II flights. Data-sets obtained during the NARVAL-II transfer flights from and to Germany \(i.e. RF1 and RF10\) are not included in the analysis, because most measurements took place outside the trades and cirrus fields were present inside the trades. RF5 and 7 are excluded as well since cirrus fields covered most of the research area during RF5 and RF7's objective was to cross the Inter Tropical Convergence Zone \(ITCZ\) for several times. NARVAL-I lidar data \(obtained from measurements inside the trades \(10 to 20° N\)\) are used to compare obtained results from the 2016 summer season to the 2013 winter season.](#)

[Altogether a 22 h-lidar data set measured in the dust-free trades and a 16 h-lidar, a 16 h-lidar data set measured in SAL trade wind regions and a 44 h-data set obtained in winter season is used to study differences in macro-physical cloud properties in between the respective regions during NARVAL and seasons.](#)

## 2.2 The WALES instrument

The WALES instrument (Wirth et al., 2009) is a combined airborne high spectral resolution (HSRL; Esselborn et al. (2008)) and water vapor differential absorption lidar system (DIAL), built and operated by the Institute for Atmospheric Physics of the German Aerospace Center (DLR). The system provides highly resolved information on the vertical distribution of water vapor mixing ratio from measurements at four wavelengths around 935 nm. Additionally, it is capable of polarization sensitive measurements at 1064 nm and 532 nm wavelength. The 532 nm channel is also equipped with High Spectral Resolution Lidar (HSRL) capability, which allows to determine the extinction coefficient without assumption on scattering properties of aerosol and cloud particles, hence enabling an enhanced characterization of them.

WALES measurements are performed in near nadir direction ( $2^\circ - 3^\circ$  off-nadir angle) and provide vertical profiles of particle backscatter, linear depolarization and extinction from the aircraft down to the ground level. The vertical resolution of the WALES aerosol and cloud data is 15 m. The temporal resolution ~~can be adjusted to suit the measurement situation. For the present study a temporal resolution of 1 Hz, resulting of the raw data is 5 Hz and is averaged to 1 Hz for a better signal to noise ratio. This results~~ in a horizontal resolution of approximately 200 m at typical aircraft speed, ~~is used.~~

Depolarization data quality is ensured by frequent calibrations following to the  $\pm 45^\circ$  method described by Freudenthaler et al. (2009). Remaining relative uncertainties in aerosol depolarization measurements ~~are estimated to be~~ in the range from ~~10 to 16 %~~ ~~10 % to 16 % (Esselborn et al., 2008)~~ and are primarily caused by ~~the mechanical imprecision of the calibration setup (Esselborn et al., 2008) and possible~~ atmospheric variations during the calibration. For backscatter and extinction measurements relative uncertainties of less than 5 % and ~~10 to 20 %~~ ~~10 % to 20 %~~ have to be considered.

## 2.3 Dust layer detection

Based on the aerosol classification scheme described by Groß et al. (2013), WALES measurements can be used to identify and characterize layers of long-range transported Saharan dust. In this study the particle linear depolarization ratio at 532 nm ( $\delta_{p532}$ ) is used as an indicator for non-spherical dust particles. Saharan dust  $\delta_{p532}$  near source regions was found to take values around 30 % (Freudenthaler et al., 2009; Tesche et al., 2009; Groß et al., 2011). This value does not change for long-range transported Saharan dust (Wiegner et al., 2011; Burton et al., 2015; Groß et al., 2015; Haarig et al., 2017). Thus  $\delta_{p532}$  is a good proxy to distinguish long-range transported Saharan dust from less depolarizing marine boundary layer aerosols which typically take values around 3 % (Sakai et al., 2010; Burton et al., 2012; Groß et al., 2013). To reduce signal noise biases, an additional filter to flag mineral dust layers for regions with 532 nm-backscatter ratios ( $BSR_{532}$ ) equal or higher 1.2 is applied ( $BSR_{532} = 1 + \beta_{p532}/\beta_{m532}$  - where  $\beta_{p532}$  and  $\beta_{m532}$  are the particle and molecular backscatter coefficients). The origin of identified dust layers is further verified using calculated backward trajectories utilizing the HYbrid Single Particle Lagrangian Integrated Trajectory model (HYSPLIT model, Stein et al. (2015)) with NCEP GDAS (National Centers for Environmental Prediction Global Data Assimilation System) data input. Starting times and locations are chosen ~~accordingly~~ to match the center of detected mineral dust layers in the lidar profiles. ~~To check the~~ ~~The~~ reliability of the backward trajectory calculations ~~;~~ ~~was checked by slightly modifying~~ starting times and locations ~~are slightly modified and results are compared.~~

Once verified as transported Saharan dust layer, the WALES HSRL ~~partiele-extinction-measurements-at-532-nm-measurements~~ are used to calculate the aerosol optical depth at 532 nm of both the detected Saharan dust layers ( $\tau_{SAL(532)}$ ) and the atmospheric column ranging from the aircraft down to ground level ( $\tau_{tot(532)}$ ). Additionally, the Saharan dust layer's vertical extent  $\Delta z_{SAL}$  is defined as the sum of all dust-flagged 15 m-resolved height intervals within each vertical lidar profile.

## 5 2.4 Lidar-derived cloud macro-physical properties

Lidar derived cloud detection is usually performed using fixed signal thresholds (e.g. Medeiros et al. (2010); Nuijens et al. (2009, 2014)) or by applying wavelet covariance methods for the detection of sharp gradients to the backscattered signal (Gamage and Hagelberg, 1993). During NARVAL-II it was found that  $BSR_{532}$  in the cloud-free marine trade wind boundary layer as well as in the elevated SAL never exceeds a ratio of 10. Marine trade wind water-clouds are optically thick and thus take much larger values. Based on these findings and to avoid potential miscategorizations of sharp aerosol gradients as cloud tops using wavelet transforms a fixed threshold of  $BSR_{532} = 20$  is used for the cloud/no-cloud decision.

To determine the cloud top height (CTH) ~~in a vertical lidar profile,~~ the  $BSR_{532}$  profile is scanned from flight level downwards to 250 m altitude and the first range bin where  $BSR_{532}$  is greater or equal to the defined threshold is marked. Additionally, the whole profile is flagged as a 'cloud containing' profile. All 'cloud containing' profiles with cloud top heights in a certain altitude range are taken and divided by the total number of cloud-flagged profiles to obtain the CTH-fraction in the respective bin of the overall CTH-distribution. Similar to that the cloud fraction (CF) is defined as the number of all 'cloud containing' profiles divided by the total number of vertical lidar profiles.

For the calculation of cloud lengths along the flight path neighboring cloud-flagged vertical profiles are connected ~~and the.~~ The cloud length is defined as the length of such a connected component then determined as a function of the respective geolocations (aircraft latitude and longitude) and CTH using the haversine formula. Cloud gaps are calculated analogously by connecting neighboring cloud-free profiles. Due to the instruments maximum horizontal resolution of approximately 200 m it is possible to resolve minimum cloud (gap) lengths of 200 m. It should be mentioned that not the maximum cloud (gap) length of each individual cloud, but the along-track cloud (gap) length is derived. As a result, the amount of small clouds (gaps) in this study may be overestimated.

## 25 3 Results

### 3.1 Dust measurements during NARVAL-II

In the following the measurement situation during the four HALO-flights used to characterize long-range transported Saharan dust layers (see Section 2.1) is summarized and their influence on subjacent marine trade wind clouds is investigated (Figure ~~??~~-2). The Saharan origin of the observed dust layers is verified using 10-day backward-trajectories with starting points at the center of the respective Saharan air layers (Figure 3). All observed dust layers traveled for 5 to 10 days from the Adrar-Hoggar-Air region in central Africa to the measurement location over the western North Atlantic Ocean. In central

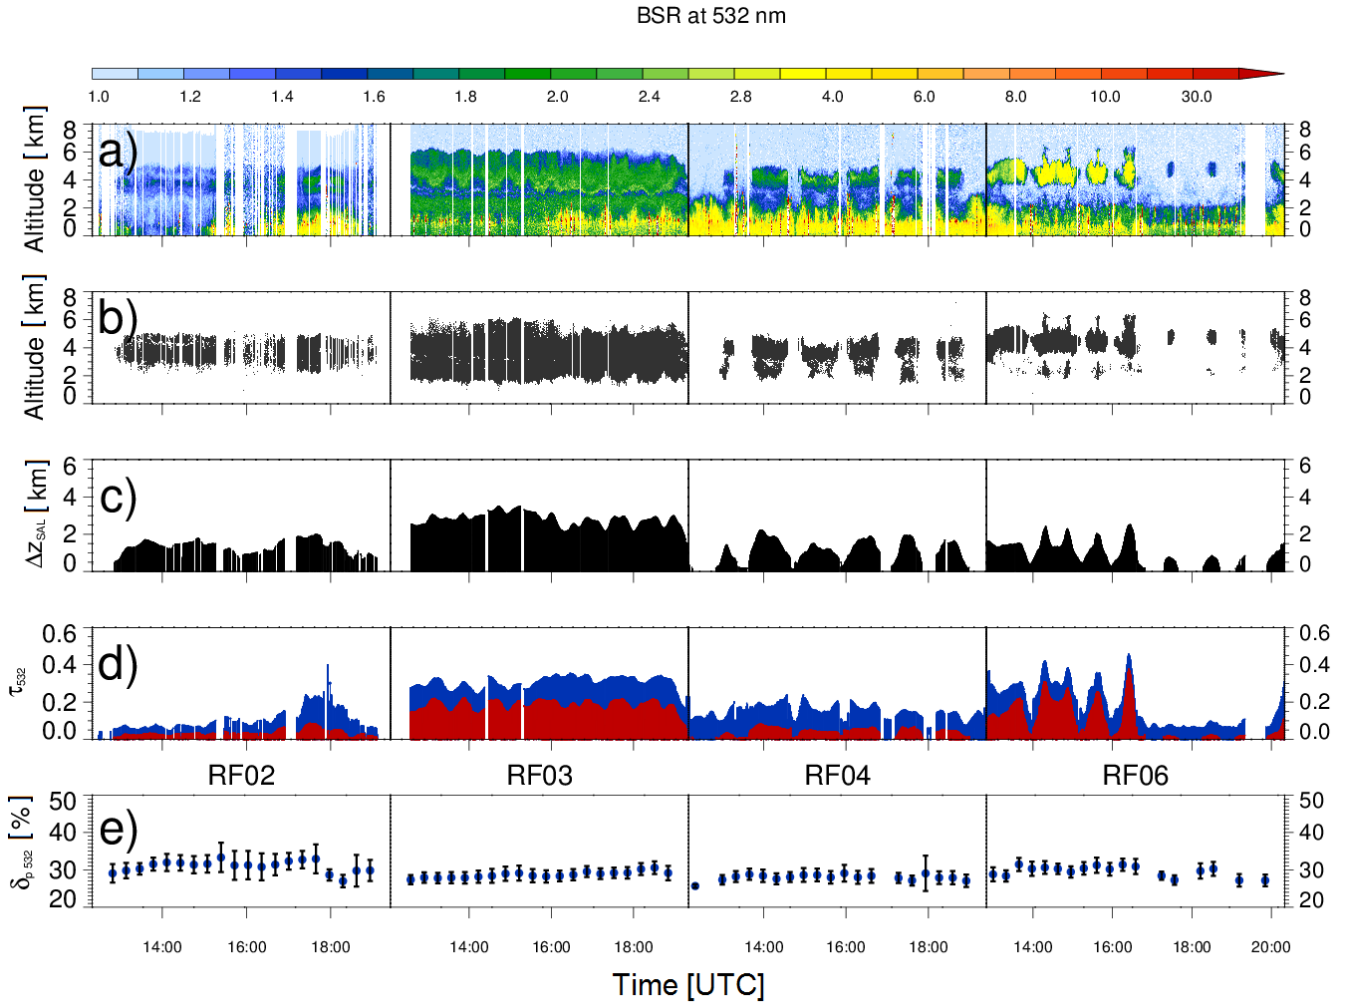

**Figure 2.** Overview of the four NARVAL-II research flights leading over Saharan dust-laden trade wind regions. (a) Cross sections of measured BSR at 532 nm and (b) applied mineral dust mask. **Locations of dropsonde profiles discussed in section 3.2 are marked with black lines (DS1, DS2).** (c) 10-minute boxcar average of the calculated dust layer vertical extent  $\Delta z_{SAL}$ . (d) 10-minute boxcar average of the derived total dust aerosol optical depth from aircraft to ground level  $\tau_{tot}(532)$  (blue) and aerosol layer optical depth  $\tau_{SAL}(532)$  (red). (e) Mean values and standard deviations of the measured 10-minute averaged SAL particle linear depolarization ratio ( $\delta_{p532}$ ).

[Africa the SAL is formed by intense surface heating and dry convection which mixes dust particles to altitudes of up to 6 km \(Gamo, 1996\).](#)

During RF2 on 10 August a thin Saharan dust layer ( $\Delta z_{SAL} < 2$  km) ranging from 2.5 to 5.0 km altitude was detected during the whole flight. A mean  $\delta_{p532}$  of 30% clearly classifies this elevated layer as a mineral dust layer.  $\tau_{SAL}(532)$  took values around 0.15 - on average approximately 35% of the total column aerosol optical depth during this RF. Unfortunately, bright

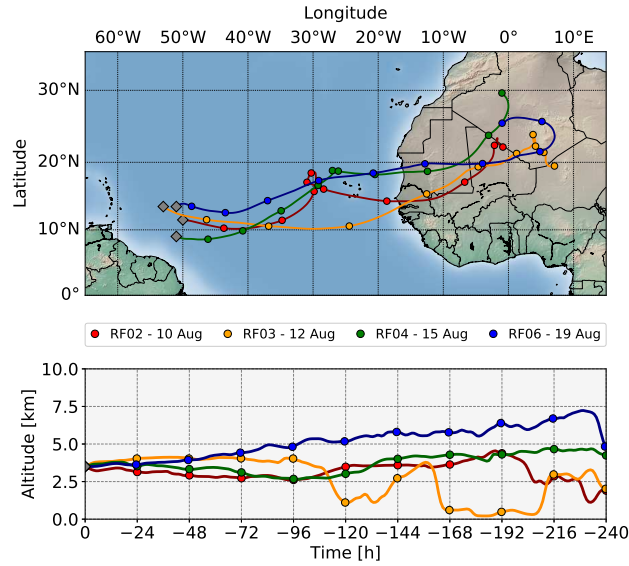

**Figure 3.** 10-day backward trajectories with starting points at the center of the respective Saharan air layers for the four NARVAL-II research flights leading over Saharan dust-laden trade wind regions (RF2, 3, 4 and 6).

and strongly reflecting clouds in the lidar field of view caused the safety circuit of the detector unit to shut down the device, causing some gaps in the continuous lidar data set.

In contrast to RF2, a vertically and optically thick dust layer was observed during the whole RF3 on 12 August.  $\delta_{p532}$  of this layer ranged from ~~28 to 30%~~ 28% to 30%, thus confirming the presence of Saharan mineral dust. The layer had a maximum vertical extent of  $\sim 4$  km, showed aerosol optical depths around 0.2 and contributed on average with 60% to the total column aerosol optical depth during that flight.

While RF2 and RF3 were designed for measurements solely in dust-laden regions, RF4 and RF6 on 15 and 19 August were planned for measurements in both dust-laden and dust-free regions within the very same research flight. Flight tracks were chosen to cross dust-gradients frequently, resulting in multiple flight segments of dust and no dust along the flight track. Elevated aerosol layers showed mean  $\delta_{p532}$  of 30% and could therefore be identified as SAL. While the SAL during RF4 ranged on average from 2.5 to 4.5 km, it reached higher to almost 6 km altitude during RF5. With  $\tau_{SAL(532)} \approx 0.1$  the dust layer during RF4 contributed on average 25% to  $\tau_{tot(532)} \cdot \tau_{SAL(532)}$  during RF6 took higher values of up to 0.4 and showed a mean contribution of 51% to  $\tau_{tot(532)}$ .

The following case study presents a detailed description of RF6 including an analysis of dropsonde-profiles in dust laden and dust free regions.

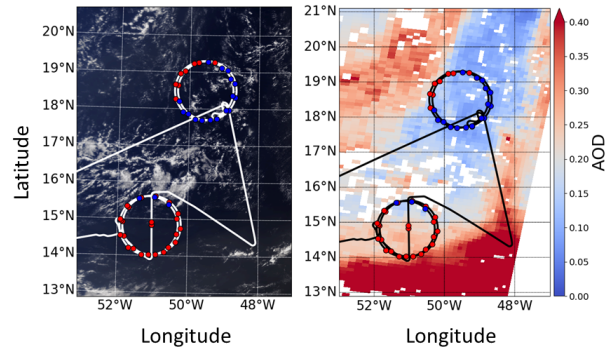

**Figure 4.** Flighttrack of RF6 on 19 Aug 2016 on top of ~~a true-color~~ the Terra-MODIS (MODerate-resolution Imaging Spectroradiometer) ~~true color~~ image ~~taken~~ (left) and the MODIS aerosol optical depth (AOD) product (right) at 13:40 UTC. ~~Launched dropsondes are marked by colored dots (red dots: mineral dust laden regions, blue: dust free regions).~~

### 3.2 Case study - 19 Aug 2016

RF6 on 19 August 2016 took place in the area between 48°W to 60°W and 13°N to 19°N (Figure 4). The Intertropical Convergence Zone (ITCZ) and associated deep convection were located ~~far ~550 km~~ south of the flight track ~~-Thus, at around 10°N~~ and it is not expected to have an influence of the ITCZ on our analysis. RF6 was planned to cross a sharp gradient between a dust-laden and a clear region in an altitude of approximately 8.25 km with about one half of the measurement time in dust-laden and the other half in dust-free regions. The circular patterns of the flight track were ~~planned-flown~~ for dropsonde-based divergence measurements. Whereas the first pair of circles was performed over a heavily dust-laden region in the southern part of the flight track, the second pair was performed in the northern part over ~~a-an almost~~ dust-free region. ~~This is also seen in MODIS aerosol optical depth imagery at 13:40 UTC in Figure 4 (right) where the region around the southern circle shows a maximum aerosol optical depth greater 0.4.~~

Measured cross sections of  $BSR_{532}$  and the derived mineral-dust mask (Figure 2 (a, RF6) and (b, RF6)) show pronounced elevated mineral dust layers ranging from 2.5 to 5.0 km altitude, horizontally alternating with dust-free profile regions. ~~Backward trajectory calculations affirm the Saharan origin of the layers (not shown here).~~ ~~Dropsondes~~ ~~Due to the conducted divergence measurements, dropsondes~~ were launched frequently along the circular flight ~~paths-tracks~~ and are used to compare vertical profiles of meteorological parameters in dust-laden to those in dust-free regions. For this purpose ~~two representative dropsonde measurements are selected: one in the southerly SAL-region (D1)~~ mean profiles of potential temperature  $\theta$ , relative humidity and water vapor mass mixing ratio ( $r$ , MR) as well as wind speed and direction ( $u$ ,  $wdir$ ) of all dropsonde-measurements in the respective dust-laden and ~~another one in the more northerly dust-free region (D2) where only some residual Saharan dust is detected.~~ ~~Additionally the regions are compared in Figure 5.~~ Additionally, lidar-derived  $\delta_{p532}$  is analyzed ~~at the locations of~~



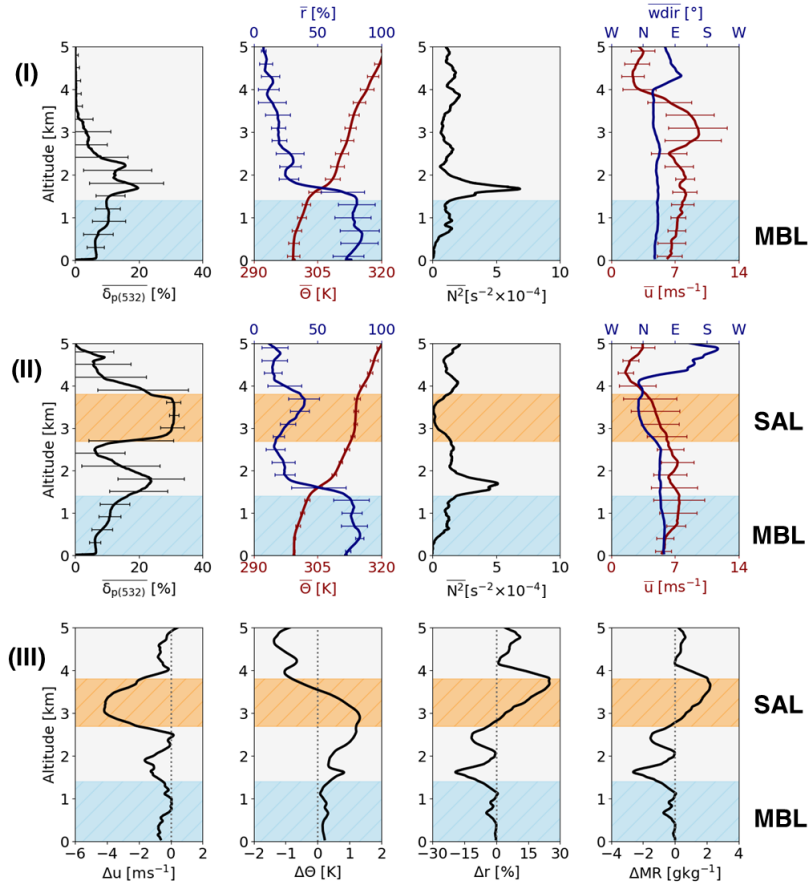

**Figure 5.** Dropsonde and lidar-derived Mean vertical WALES lidar profiles of  $\delta_{p532}$  (error bars indicate systematic errors), and mean vertical dropsonde profiles of relative humidity ( $r$ ), and potential temperature ( $\theta$ ), squared Brunt-Väisälä frequency  $N^2 = \frac{g}{\theta} \frac{d\theta}{dz}$  at waypoints D1  $N^2 = \frac{g}{\theta} \frac{d\theta}{dz}$  as well as wind speed (left panels  $u$ ) and D2 direction (right panels  $wdir$ ) – A running mean  $\pm 150$  m is applied to reveal general features in  $N^2$ -profiles dust-free (I) and dust-laden (II) regions during RF6 on 19 Aug 2016 (horizontal bars indicate standard deviations). Differences in wind speed, potential temperature, relative humidity and water vapor mass mixing ratio (MR) between the two regions are shown in (III).

the dropped sondes (D1: 14.94° N, 51.866 E; D2: 17.755° N, 49.195° E) for both regimes.

Inside the SAL-region (D1) a three-layer structure is present: 1) the marine boundary layer (MBL), reaching up to approximately 1.3 km height.  $\delta_{p532}$  smaller 10 % indicate indicates that marine aerosols are the dominant contributor to the aerosol composition of the MBL; 2) a transition or mixed layer extending from the MBL-top to  $\sim 2.5$  km  $\sim 2.8$  km altitude with varying values of  $\delta_{p532}$  ( $10\% < \delta_{p532} < 20\%$ ); and 3) the elevated SAL, with typical  $\delta_{p532}$  for long-range transported Saharan dust ( $\delta_{p532} \sim 30\%$ ) ranging from 2.8 to 4.0 km 2.8 to 3.8 km height.

The mean dust-free  $\delta_{p532}$ -profile (D2) of the MBL and transition layer looks quite similar to mean dust-laden profile (D1)  $\delta_{p532}$ -profile.

However, no SAL-signature is detected. The low CF in the dust-laden region (southern part of the flight track) which is visible in the MODIS image (~~Moderate-resolution Imaging Spectroradiometer~~; Figure 4) is also evident in lidar measurements after the application of the described threshold method for cloud detection. Whereas a lot of cloud tops in heights ranging from 0.5 to 1.5 km altitude are detected in the northern part of the flight track (after about 16:45 UTC), almost no cloud is detected along the earlier southern flight path - with the exception of the transition region to the dust free area (cloud top heights at  $\sim 1.5$  km altitude).

This is also evident in the calculated cloud fractions. CF is 20 % in dust-free regions. In the SAL-region however, CF decreases to 11 % (including the clouds developing at the edges of the dust layer). Another characteristic of clouds in SAL-regions is that their CTH is rarely higher than approximately 1 km. However, in dust free regions cloud top heights reach almost twice as high and up to 2 km. Divergence measurements discussed by Bony and Stevens (2019) and Stevens et al. (2019) show that dynamical properties in the two regions are different as well. They found that MBL-vertical velocity in the dust-free regime is directed upwards and could explain the observed increased cloud top heights.

~~Differences~~ For an investigation of the question why vertical wind speeds, cloud tops and cloud fractions are higher in the dust-free regime than in the SAL-regime differences in meteorological parameters between SAL-regions and dust-free regions are discussed by looking at dropsonde measurements (D1, D2). Both dropsondes analyzed by discussing mean profiles of all dropsonde measurements in the respective regions. Both the dust-laden and the dust-free region clearly indicate the so-called trade wind inversion (TWI) in the an altitude range from 1.3 to 1.7 km 1.5 to 1.8 km height capping the moist MBL. The TWI is characterized by a rapid temperature increase decrease of about 4 K within 400 m (not shown) and a strong hydro-lapse (relative humidity (r) drops from  $>80$   ~~$>80$~~  % to  $\sim 30$  %). The MBL itself shows no significant variations in relative humidity in both. In both regimes the MBL itself can be divided into the so-called sub-cloud layer which extends from ocean surface to 0.5 to 0.7 km and the cloud layer (Groß et al., 2016) which extends from the sub-cloud layer top to the TWI ( $\sim 0.5$  to  $\sim 1.8$  km). Those two regions can be identified in profiles of  $\Theta$  and humidity. Whereas the sub-cloud layer is well mixed ( $\Theta = \text{const.}$ ,  $MR = \text{const.}$ ), the cloud layer shows a conditionally unstable lapse rate of 5 to 7 K  $\text{km}^{-1}$  (saturated air parcels are unstable to vertical displacement). Overall, measurements of  $\Theta$  and humidity show a stronger variation in the dust-free and the dust-laden regimes with mean values of 85 % MBL than in the dust laden one, suggesting the presence of more boundary layer clouds in dust-free regions.

Nuijens et al. (2009) and Nuijens and Stevens (2012) found that high wind speeds near surface correspond to an increase of boundary layer humidity leading to a deepening of the cloud layer and increased area rainfall. Lonitz et al. (2015) used Large Eddy Simulations to show how higher relative humidities associated with observed dusty boundary layers changes the evolution of the cloud layer. However, when comparing boundary layer wind speed and humidity in the two regimes no distinct differences can be observed, indicating that some other mechanism must be responsible for the observed differences in vertical wind speed, cloud fraction and cloud top height. The MBL of both regimes is dominated by north-easterly winds with speeds around  $7 \text{ ms}^{-1}$ . In dust-laden regions wind speeds in SAL-altitudes are by  $4 \text{ ms}^{-1}$  lower than in the dust-free regions. This suggests that the SAL represents a decoupled layer which penetrates into the trade-wind regime. Moreover, enhanced amounts of water vapor are observed inside the long-range transported SAL. Relative humidity and water vapor mass mixing ratio show an

increase of  $2 \text{ g kg}^{-1}$  in SAL regions compared to the dust-free trade wind region. Such an increase has already been observed by Jung et al. (2013). From radiosonde measurements they found that the SAL transports moisture from Africa towards the Caribbean and gets moistened during transport by upwelling surface fluxes.

For a better visualisation of regions featuring high visualization of atmospheric stability the squared Brunt Väisälä frequency  $N^2 = \frac{g}{\Theta} \frac{d\Theta}{dz}$ , with  $g$  being the gravity of the Earth and  $\Theta$  the potential temperature, is shown.  $N^2$  shows regions of high atmospheric stability and thus strong restoring forces for a vertical air parcel displacement at the inversion altitudes. Enhanced atmospheric stability is found at the TWI for both analyzed dropsonde measurements regimes. At higher altitudes the  $N^2$ -profiles look different. In dust-laden regions the lower and upper boundary of the SAL are characterized by two additional well-known inversions (Carlson and Prospero, 1972; Dunion and Velden, 2004; Ismail et al., 2010). Inside the layer  $N^2$  is almost zero - indicating a well mixed SAL-regime. Furthermore,  $\Theta$  points towards a neutral stratification in the interior of the SAL since it does not change with altitude. Altogether, a total of three prominent inversion layers counteract convective development in dust-laden regions, whereas in dust-free regions only just the trade wind inversion is present.

### 3.3 Differences in cloud macro-physical properties

In a next step differences in

In conclusion, one can suggest that the SAL potentially modifies radiative transfer, atmospheric stability as well as the evolution of vertical velocities, hence representing a proxy for reduced amounts of clouds and lower cloud top heights. To discuss this hypothesis, differences in cloud macro-physical properties of shallow marine clouds between the identified dust-laden and dust-free flight segments are studied and investigated for the whole NARVAL field campaign series.

### 3.3 Differences in cloud macro-physical properties

#### 3.3.1 Cloud fraction and cloud top height

A first indicator for differences in marine trade wind cloud occurrence is the cloud fraction CF. During NARVAL-II a total number of  $3.2 \times 10^4$  one second resolved cloud tops were detected in trade wind regions ( $N_{CT(dust)} = 8 \times 10^3$ ;  $N_{CT(nodust)} = 2.4 \times 10^4$ ). They contribute to an overall observed CF of 24 % within the measurement period. In dust-free regions a CF of 31 % was derived, while in SAL-regions CF was smaller by a factor of more than two (14 %). In winter season (NARVAL-I) an almost three times higher CF of 37 % is derived. The next parameter to look for differences between the two cases three regions is the CTH-distribution for both regions (Figure 6). In the SAL-regions only a small fraction of clouds exceeds an altitude of 2 km and no cloud top is found at altitudes greater 2.5 km. The majority of cloud top heights ( $\sim 61$  %) is found within the altitude range from 0.5 to 1.0 km in lower altitudes of the MBL-cloud layer. 26 % of all detected cloud top heights are located in the 1.0 to 1.5 km height interval and only 11 % of that fraction contribute to the interval from 1.5 to 2.0 km altitude.

Cloud tops in altitudes  $>2.5$  km including deeper reaching convection with maximum top heights of 6 km are found in  $\sim 16$  % of all dust-free cloud profiles. Underneath Below around 3 km altitude the CTH-distribution shows a two-modal structure with

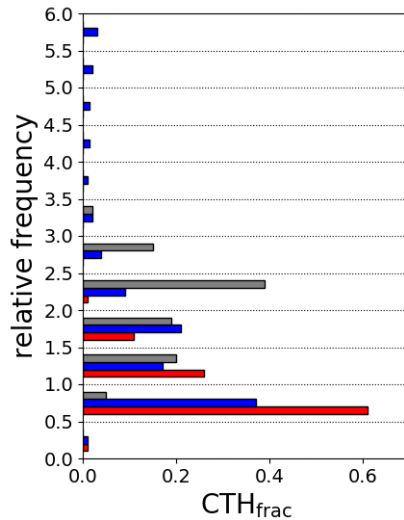

**Figure 6.** Histograms of detected cloud top height fractions during [NARVAL-II](#), [NARVAL-I and II](#) with bins of 0.5 km size. Red bars illustrate the distribution of cloud [tops-top](#) height fractions in SAL-regions. Blue bars represent the derived cloud top height distribution from measurements in the dust-free trades [during NARVAL-II](#). Grey bars show the derived cloud top height in the dust-free winter season [during NARVAL-I](#).

two local maxima ranging from 0.5 to 1.0 km ( $\sim 35\%$ ) and 1.5 to 2.0 km altitude ( $\sim 20\%$ ). [Several clouds were also detected in the lowermost 0.5 km of the atmosphere \( \$\sim 1\%\$ \). Most likely those clouds are evolving or dissipating clouds at the bottom of the cloud layer.](#)

[In the dust-free winter season a shift of the distribution to higher altitudes is observed, since most cloud tops were sampled in the interval from 2 to 2.5 km altitude \( \$\sim 39\%\$ \). However, no cloud was observed in altitudes greater 3.5 km. This shift is caused by a slightly higher TWI in winter months, shown in Stevens et al. \(2017\) who compare mean dropsonde-profiles of water vapor mixing ratio during in NARVAL-I and II.](#)

The statistical significance of observed differences in the distributions was checked by randomly resampling the respective data-sets to smaller sub-sets and by comparing the shapes of the resulting distributions to the shape of the overall distributions. The shapes of the resampled distributions showed no major differences compared to the overall distributions, thus it can be concluded that our NARVAL-II measurements indicate the presence of less and shallower clouds in Saharan dust laden trade wind regions compared to dust-free regions.

### 3.3.2 Cloud lengths and cloud gaps

As next step the cloud length and cloud gap length distributions of marine trade wind clouds in SAL-regions and mineral dust free regions are investigated (Figure 7, top). A total of 3688 and 2355 clouds were observed in dust free and dust-laden regions

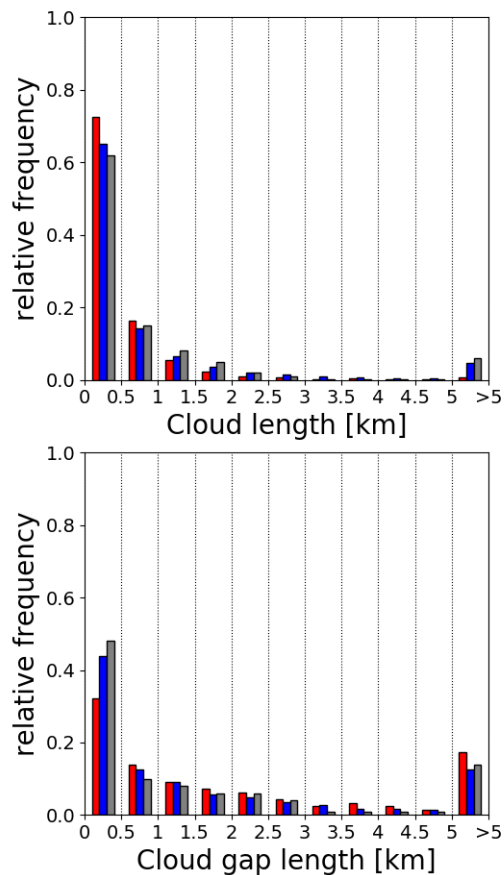

**Figure 7.** Histograms of detected cloud lengths (top) and cloud gap lengths (bottom). Red bars illustrate the distribution of marine low cloud (gap) lengths located underneath below Saharan dust layers. Blue bars represent the cloud (gap) length distribution derived from measurements in the dust-free areas trades during NARVAL-II. Grey bars show the derived distribution in the dust-free winter season during NARVAL-I.

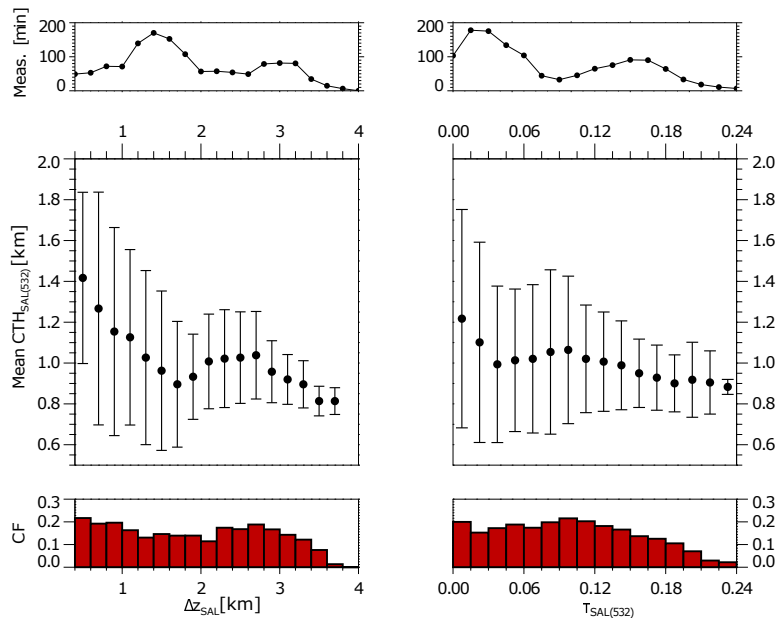

**Figure 8.** Left: Mean cloud top heights (middle) and cloud fraction (bottom) of clouds detected underneath below Saharan dust layers as a function of Saharan dust layer vertical extent ( $\Delta z_{SAL}$ ) - bin-interval: 0.2 km, Right: Mean cloud top heights (middle) and cloud fraction (bottom) of clouds detected underneath below Saharan dust layers as a function of Saharan dust layer optical depth ( $\tau_{SAL(532)}$ ) at 532 nm wavelength - bin-interval: 0.015. Bars mark respective standard deviations of mean cloud top heights ( $1\sigma$ ). The uppermost graphs illustrate summed measurement-times in each interval.

- during the NARVAL-II research flights. In both regions and 5010 clouds were detected during NARVAL-I in dust-free winter. In all three samples clouds with a horizontal extent of less than 0.5 km are by far the most prominent cloud type ones. Whereas 72 % of all clouds in SAL-regions are of this length, 65 % of all clouds detected in clear regions summer trade wind regions and 61 % in winter time measurements contribute to this length-interval. In both regions the frequency of cloud length occurrence
- 5 decreases strongly with increasing cloud length. Relative frequency drops to  $\sim 17\%$  (dust-laden) and  $\sim 16\%$  (dust-free) and 16 % (NARVAL-I) in the length interval from 0.5 to 1.0 km. Only 5 % of all clouds in dusty regions are observed to have a horizontal extent greater than 2 km. This fraction almost doubles to 9 % in dust-free regions and in winter months. The main contributor to this fraction are clouds with horizontal extents of more than 5 km (4%4 and 5 %). Clouds of this length are basically only found outside dust-laden regions.
- 10 Another important parameter to highlight differences of cloudiness between SAL-regions and dust-free regions is the cloud gap length (Figure 7, bottom). Similar to the distribution of cloud lengths, also cloud gap frequencies decrease with increasing cloud gap length. In both all three regimes cloud gaps shorter 0.5 km are dominating. They contribute with 45 % and 35 % to the total amount of observed cloud gaps in dust-free and dust-laden regions -A reverse during NARVAL-II and with even

48% in winter months. A different picture emerges, when looking at the amount of cloud gaps greater than 5 km. A fraction of 17% is found to be greater than 5 km underneath below dust layers, whereas in dust-free regions and winter months these gap sizes contribute with 12% and 14% to the distribution. Cloud gap fractions in range-bins from 1.5 to 4.5 km decrease in both regions consistently with increasing cloud gap length.

- 5 The significance of the distribution-properties was again double-checked by the comparison to randomly resampled sub-datasets. Overall, the cloud length and gap length distributions (Figure 7) indicate, that the dust-laden trade wind regimes during NARVAL-II were characterized by a larger amount of small scale clouds and slightly greater cloud gaps, compared to the dust free and winter regimes.

### 3.3.3 Connecting dust and cloud properties

- 10 As a further step the observed CTH and CF are related to the geometrical and optical depth ( $\Delta z_{SAL}$  and  $\tau_{SAL(532)}$ ) of overlying mineral dust layers (Figure 8). Cloud fractions and heights in dust-flagged profiles of all four research flight flights are grouped together with respect to similar  $\Delta z_{SAL}$  (bin width: 0.2 km) and  $\tau_{SAL(532)}$  (bin width: 0.015). During NARVAL-II Saharan dust layers with maximum vertical extents of 4 km and maximum optical depths of 0.4 were observed (Figure 2). However, underneath below optically thick dust layers ( $0.24 < \tau_{SAL(532)} ; 3.8 \text{ km} < \Delta z_{SAL} < 0.24; z_{SAL} > 3.8 \text{ km}$ ) not any  
 15 cloud has been detected.

- The distribution of CTH as a function of  $\Delta z_{SAL}$  shows that up to a layer thickness of 1.6 km-1.8 km mean CTH decreases with increasing  $\Delta z_{SAL}$  from  $\sim 1.4$  to  $\sim 0.8$  km altitude. For a greater layer thickness ( $\Delta z_{SAL} > 1.6 \text{ km} > 1.8 \text{ km}$ ) this trend is not evident anymore. A further increase in  $\Delta z_{SAL}$  does not imply a significant decrease in mean CTH - in some bin-intervals the mean CTH even increases slightly. Mean cloud top heights vary strongly underneath below vertically thin dust layers ( $\sigma =$   
 20  $0.5 \text{ km}$ ) - an indication for the presence of both shallow developing convective clouds and higher reaching trade wind clouds within the MBL. With increasing  $\Delta z_{SAL}$  the variability of mean CTH decreases and reduces to  $\sigma < 0.2 \text{ km}$  for  $\Delta z_{SAL} < 3 \text{ km}$ . This suggests that the cloud layer indeed lowers and that the few evolving clouds are confined to low levels of the MBL. The CF distribution as a function of  $\Delta z_{SAL}$  does not show any distinct trend for geometrically thin layers. For  $\Delta z_{SAL} < 1.0 \text{ km}$  CF takes values around 20% - only slightly lower values than the CF derived from measurements in dust-free regions. For  
 25 vertical extents ranging from  $1.0 \text{ km} < \Delta z_{SAL} < 2.6 \text{ km}$  no clear decrease in CF is detected. In this range CF varies around 15% and even increases slightly. A clear decreasing trend of CF with increasing  $\Delta z_{SAL}$  is obvious only for  $\Delta z_{SAL} > 2.6 \text{ km}$ . Next, the CTH distribution as a function of dust layer optical depth  $\tau_{SAL(532)}$  is analyzed. Up to a value of  $\tau_{SAL(532)} \sim 0.05$  the mean CTH decreases with increasing optical depth of the aerosol layer. The mean CTH drops from  $\sim 1.3 \text{ km}$  to  $\sim 1.0 \text{ km}$  in this region. A further increase of  $\tau_{SAL(532)}$  to a value of about 0.12 does not show any further decrease in mean CTH. This  
 30 is in line with the observed decrease in CF as a function of dust layer optical depth in this range. The observed CF increases slightly from 15 to 20% 15% to 20% for small SAL-optical depths ( $\tau_{SAL(532)} < 0.12$ ). At the upper tail of the distribution ( $0.12 < \tau_{SAL(532)}$ ) the mean CTH as well as the CF decrease again. CF shows a steady decrease of about 20% in the range from  $\tau_{SAL(532)} = 0.12$  to 0.24. Moreover, the variability of mean CTH in that range gets smaller, again indicating that higher-reaching convection is suppressed.



For the interpretation of these distributions the accumulated measurement-time in the respective intervals as well as the contribution of different research flights have to be taken into account. Mainly data collected in the course of RF3 contributes to SAL-measurements in the ranges  $0.09 < \tau_{SAL(532)} < 0.24$  and  $2 \text{ km} < \Delta z_{SAL} < 4 \text{ km}$  (Figure 2), thus being the main contributor to observed increases of mean CTH and CF in regions of high  $\tau_{SAL(532)}$  and  $\Delta z_{SAL}$ . The remaining research flights (RF2, 5 RF4 and RF6), were characterized by thinner dust layers that were rather decoupled from the MBL and contribute to regions of small  $\tau_{SAL(532)}$  and  $\Delta z_{SAL}$ .

Altogether, a decreasing trend of CTH and CF as a function of dust layer optical depth and vertical extent was detected during research flights over elevated and long-range transported Saharan dust layers. However, RF3 showed a predominant and strongly pronounced transition layer that possibly altered the cloud layer resulting in an increased CF and CTH in the 10 respective intervals of  $\tau_{SAL(532)}$  and  $\Delta z_{SAL}$ .

#### 4 Summary and Conclusion

In this study airborne lidar measurements performed on-board the German high altitude and long-range research aircraft HALO during the ~~NARVAL-NARVAL~~ experiment experiments over the North Atlantic trade wind region were used to investigate whether marine low cloud macro-physical properties change in the presence of overlying long-range transported 15 Saharan dust layers. Significant differences in the CTH distribution as well as in the cloud length and cloud gap length distribution were found for flights in SAL-regions compared to the distributions derived from flights in dust-free regions. It can be summarized that dust-laden regions implicate less, shallower and smaller clouds than dust-free regions. The overall derived cloud fraction in the dust-laden ~~trades~~ trade wind summer regime is 14 % and thus a factor of two smaller than the cloud fraction of 31 % and 37 % derived from observations in the dust-free ~~trades~~ regime and the winter season. These results are 20 in good agreement with results of previous satellite remote sensing studies (Dunion and Velden, 2004) and model studies (Wong and Dessler, 2005; Stephens et al., 2004) which also suggest a convection-suppressing characteristic of the SAL ~~with~~. Some of those studies suggest that the main player being of the suppression characteristic is a dry anomaly in SAL-altitudes. ~~During NARVAL-However, all observed~~ long-range transported Saharan air layers during NARVAL-II were not found to come along with dry anomalies, but were rather showing enhanced ~~relative humidities~~ humidities (compared to the surrounding dry 25 free trade wind atmosphere) in the range from ~~30 to 40 %~~. ~~However~~ 2 to 4 g kg<sup>-1</sup>. Saharan air layers frequently show water vapor mixing ratios in this range over Africa (Marsham et al., 2008). During the transport towards the Caribbean the SAL conserves the received moisture and takes up additional one from upwelling surface fluxes during transport (Jung et al., 2013). Nevertheless, a suppressing characteristic of the SAL on subjacent marine clouds ~~is~~ is evident as well.

Wong and Dessler (2005) also showed that the convection barrier increases with SAL-aerosol optical depth. To investigate a 30 possible relation between SAL optical depth or layer vertical extent and marine trade wind CTH, the CTH and CF-distribution was analyzed as a function of SAL vertical extent and optical depth. It was found that mean CTH decreases with increasing layer vertical extent for vertically thin layers (<1.5 km). Additionally, the mean CTH-variability for these layers is high, indicating the occurrence of higher-reaching clouds in those regions. There is no significant decrease of mean CTH for thicker

dust layers, but a reduction of CTH-variability could be derived. Also a decrease in mean CTH-variability with increasing dust layer optical thickness starting at  $\tau_{SAL(532)} \approx 1.2$  could be detected. ~~This indicates that optically and vertically thicker dust layers suppress the evolution of higher reaching convection.~~ Moreover, a decrease in CF comes along with this reduction in variability of the mean CTH. Underneath Below optically thick dust layers with  $0.24 < \tau_{SAL(532)} > 0.24$  not any cloud was  
5 detected. These results indicate that optically and vertically thick elevated Saharan dust layers have a greater suppressing effect on convection below than optically and vertically thin layers. Dropsonde profiles of potential temperature  $\theta$  and the squared Brunt-Väisälä frequency  $N^2$  in dust-laden trade wind regions indicate two inversions at the bottom and the top of the SAL, which additionally counteract convective development. Those two SAL-related additional inversion layers are an explanation why there are less and shallower clouds in SAL regions and why thick and pronounced dust layers introduce a more stable  
10 stratification to the trade wind regime than less pronounced ones.

Altogether, ~~NARVAL-the~~ NARVAL lidar measurements indicate that there is a strong correlation between the presence of elevated and long-range transported Saharan dust layers and the occurrence and macro-physical properties of subjacent marine low clouds. It is shown that Saharan dust can be used as a proxy for a decrease in subjacent trade wind cloud length and cloud top height. Further reaching questions regarding changes in radiation caused by the dust layer and its moisture, changes in the  
15 general circulation patterns or the settling of dust particles into the cloud layer (Groß et al., 2016) could not be addressed within the present work and are left to future studies and field campaigns, e.g. the upcoming EUREC<sup>4</sup>A field campaign (Elucidating the Role of Clouds-Circulation Coupling in ClimAte) in early 2020 (Bony et al., 2017).

*Author contributions.* In the framework of the NARVAL-II field experiment Martin Wirth and Silke Groß contributed to carry out all airborne lidar measurements used in this study. Martin Wirth did the initial data processing. Manuel Gutleben performed all analytic computations,  
20 statistically analyzed the data set and took the lead in writing the manuscript under consultation of Silke Groß. All authors discussed the results and contributed to the final manuscript.

*Competing interests.* none declared

*Acknowledgements.* The authors like to thank the staff members of the DLR HALO aircraft from DLR Flight Experiments for preparing and performing the measurement flights. ~~Data sets~~ The data used in this publication ~~were was~~ collected during the ~~NARVAL-II~~ NARVAL  
25 (Next-generation Aircraft ~~Remote-Sensing for Validation Studies~~) campaign and are made available in the HALO Database. Remote-sensing for VALidation Studies campaign series and is made available through the DLR Institute for Atmospheric Physics. Moreover, the authors gratefully acknowledge all research scientists who helped to launch the dropsondes and the two anonymous referees who helped to improve this study. ~~NARVAL-NARVAL~~ was funded with support of the Max Planck Society, the German Research Foundation (DFG, Priority Program: HALO-SSP 1294) and the German Aerospace Center (DLR). This study was financed by a DLR VO-R young investigator group  
30 within the Institute of Atmospheric Physics.

## References

- Ansmann, A., Tesche, M., Althausen, D., Müller, D., Seifert, P., Freudenthaler, V., Heese, B., Wiegner, M., Pisani, G., Knippertz, P., and Dubovik, O.: Influence of Saharan dust on cloud glaciation in southern Morocco during the Saharan Mineral Dust Experiment, *J. Geophys. Res.*, 113, <https://doi.org/10.1029/2007jd008785>, 2008.
- 5 Ansmann, A., Petzold, A., Kandler, K., Tegen, I., Wendisch, M., Müller, D., Weinzierl, B., Müller, T., and Heintzenberg, J.: Saharan Mineral Dust Experiments SAMUM-1 and SAMUM-2: what have we learned?, *Tellus B*, 63, 403–429, <https://doi.org/10.1111/j.1600-0889.2011.00555.x>, 2011.
- Bègue, N., Tulet, P., Pelon, J., Aouizerats, B., Berger, A., and Schwarzenboeck, A.: Aerosol processing and CCN formation of an intense Saharan dust plume during the EUCAARI 2008 campaign, *Atmos. Chem. Phys.*, 15, 3497–3516, [https://doi.org/10.5194/acp-15-3497-](https://doi.org/10.5194/acp-15-3497-2015)  
10 2015, 2015.
- Bony, S. and Stevens, B.: Measuring Area-Averaged Vertical Motions with Dropsondes, *J. Atmos. Sci.*, 76, 767–783, <https://doi.org/10.1175/jas-d-18-0141.1>, 2019.
- Bony, S., Stevens, B., Ament, F., Bigorre, S., Chazette, P., Crewell, S., Delanoë, J., Emanuel, K., Farrell, D., Flamant, C., Gross, S., Hirsch, L., Karstensen, J., Mayer, B., Nuijens, L., Ruppert, J. H., Sandu, I., Siebesma, P., Speich, S., Szczap, F., Totems, J., Vogel, R., Wendisch, M.,  
15 and Wirth, M.: EUREC4A: A Field Campaign to Elucidate the Couplings Between Clouds, Convection and Circulation, *Surv. Geophys.*, 38, 1529–1568, <https://doi.org/10.1007/s10712-017-9428-0>, 2017.
- Boose, Y., Sierau, B., García, M. I., Rodríguez, S., Alastuey, A., Linke, C., Schnaiter, M., Kupiszewski, P., Kanji, Z. A., and Lohmann, U.: Ice nucleating particles in the Saharan Air Layer, *Atmos. Chem. Phys.*, 16, 9067–9087, <https://doi.org/10.5194/acp-16-9067-2016>, 2016.
- Burton, S. P., Ferrare, R. A., Hostetler, C. A., Hair, J. W., Rogers, R. R., Obland, M. D., Butler, C. F., Cook, A. L., Harper, D. B., and Froyd,  
20 K. D.: Aerosol classification using airborne High Spectral Resolution Lidar measurements – methodology and examples, *Atmos. Meas. Tech.*, 5, 73–98, <https://doi.org/10.5194/amt-5-73-2012>, 2012.
- Burton, S. P., Hair, J. W., Kahnert, M., Ferrare, R. A., Hostetler, C. A., Cook, A. L., Harper, D. B., Berkoff, T. A., Seaman, S. T., Collins, J. E., Fenn, M. A., and Rogers, R. R.: Observations of the spectral dependence of linear particle depolarization ratio of aerosols using NASA Langley airborne High Spectral Resolution Lidar, *Atmos. Chem. Phys.*, 15, 13453–13473, <https://doi.org/10.5194/acp-15-13453-2015>,  
25 2015.
- Carlson, T. N. and Benjamin, S. G.: Radiative heating rates for Saharan dust, *J. Atmos. Sci.*, 37, 193–213, [https://doi.org/10.1175/1520-0469\(1980\)037<0193:RHRFSD>2.0.CO;2](https://doi.org/10.1175/1520-0469(1980)037<0193:RHRFSD>2.0.CO;2), 1980.
- Carlson, T. N. and Prospero, J. M.: The Large-Scale Movement of Saharan Air Outbreaks over the Northern Equatorial Atlantic, *J. Appl. Meteorol.*, 11, 283–297, [https://doi.org/10.1175/1520-0450\(1972\)011<0283:TLSMOS>2.0.CO;2](https://doi.org/10.1175/1520-0450(1972)011<0283:TLSMOS>2.0.CO;2), 1972.
- 30 Colarco, P. R.: Saharan dust transport to the Caribbean during PRIDE: 1. Influence of dust sources and removal mechanisms on the timing and magnitude of downwind aerosol optical depth events from simulations of in situ and remote sensing observations, *J. Geophys. Res.*, 108, <https://doi.org/10.1029/2002jd002658>, 2003.
- DeMott, P. J., Prenni, A. J., McMeeking, G. R., Sullivan, R. C., Petters, M. D., Tobo, Y., Niemand, M., Möhler, O., Snider, J. R., Wang, Z., and Kreidenweis, S. M.: Integrating laboratory and field data to quantify the immersion freezing ice nucleation activity of mineral dust  
35 particles, *Atmos. Chem. Phys.*, 15, 393–409, <https://doi.org/10.5194/acp-15-393-2015>, 2015.
- Dunion, J. P. and Velden, C. S.: The Impact of the Saharan Air Layer on Atlantic Tropical Cyclone Activity, *B. Am. Meteorol. Soc.*, 85, 353–366, <https://doi.org/10.1175/BAMS-85-3-353>, 2004.

- Esselborn, M., Wirth, M., Fix, A., Tesche, M., and Ehret, G.: Airborne high spectral resolution lidar for measuring aerosol extinction and backscatter coefficients, *Appl. Opt.*, 47, 346–358, <https://doi.org/10.1364/AO.47.000346>, 2008.
- Ewald, F., Kölling, T., Baumgartner, A., Zinner, T., and Mayer, B.: Design and characterization of specMACS, a multipurpose hyperspectral cloud and sky imager, *Atmos. Meas. Tech.*, 9, 2015–2042, <https://doi.org/10.5194/amt-9-2015-2016>, 2016.
- 5 Ewald, F., Groß, S., Hagen, M., Hirsch, L., Delanoü, J., and Bauer-Pfundstein, M.: Calibration of a 35-GHz Airborne Cloud Radar: Lessons Learned and Intercomparisons with 94-GHz Cloud Radars, *Atmos. Meas. Tech. Discuss.*, pp. 1–32, <https://doi.org/10.5194/amt-2018-269>, 2018, in discussion.
- Ewald, F., Groß, S., Hagen, M., Hirsch, L., Delanoë, J., and Bauer-Pfundstein, M.: Calibration of a 35 GHz airborne cloud radar: lessons learned and intercomparisons with 94 GHz cloud radars, *Atmos. Meas. Tech. Discuss.*, 12, 1815–1839, <https://doi.org/10.5194/amt-12-1815-2019>, 2019.
- 10 Freudenthaler, V., Esselborn, M., Wiegner, M., Heese, B., Tesche, M., Ansmann, A., Müller, D., Althausen, D., Wirth, M., Fix, A., Ehret, G., Knippertz, P., Toledano, C., Gasteiger, J., Garhammer, M., and Seefeldner, M.: Depolarization ratio profiling at several wavelengths in pure Saharan dust during SAMUM 2006, *Tellus B*, 61, 165–179, <https://doi.org/10.1111/j.1600-0889.2008.00396.x>, 2009.
- Gamage, N. and Hagelberg, C.: Detection and Analysis of Microfronts and Associated Coherent Events Using Localized Transforms, *J. Atmos. Sci.*, 50, 750–756, [https://doi.org/10.1175/1520-0469\(1993\)050<0750:daaoma>2.0.co;2](https://doi.org/10.1175/1520-0469(1993)050<0750:daaoma>2.0.co;2), 1993.
- 15 Gamo, M.: Thickness of the dry convection and large-scale subsidence above deserts, *Bound.-Lay. Meteorol.*, 79, 265–278, <https://doi.org/10.1007/bf00119441>, 1996.
- Groß, S., Wiegner, M., Freudenthaler, V., and Toledano, C.: Lidar ratio of Saharan dust over Cape Verde Islands: Assessment and error calculation, *J. Geophys. Res. - Atmos.*, 116, <https://doi.org/10.1029/2010JD015435>, 2011.
- 20 Groß, S., Esselborn, M., Weinzierl, B., Wirth, M., Fix, A., and Petzold, A.: Aerosol classification by airborne high spectral resolution lidar observations, *Atmos. Chem. Phys.*, 13, 2487–2505, <https://doi.org/10.5194/acp-13-2487-2013>, 2013.
- Groß, S., Freudenthaler, V., Schepanski, K., Toledano, C., Schäfer, A., Ansmann, A., and Weinzierl, B.: Optical properties of long-range transported Saharan dust over Barbados as measured by dual-wavelength depolarization Raman lidar measurements, *Atmos. Chem. Phys.*, 15, 11 067–11 080, <https://doi.org/10.5194/acp-15-11067-2015>, 2015.
- 25 Groß, S., Gasteiger, J., Freudenthaler, V., Müller, T., Sauer, D., Toledano, C., and Ansmann, A.: Saharan dust contribution to the Caribbean summertime boundary layer – a lidar study during SALTRACE, *Atmos. Chem. Phys.*, 16, 11 535–11 546, <https://doi.org/10.5194/acp-16-11535-2016>, 2016.
- Haarig, M., Ansmann, A., Althausen, D., Klepel, A., Groß, S., Freudenthaler, V., Toledano, C., Mamouri, R.-E., Farrell, D. A., Prescod, D. A., Marinou, E., Burton, S. P., Gasteiger, J., Engelmann, R., and Baars, H.: Triple-wavelength depolarization-ratio profiling of Saharan dust over Barbados during SALTRACE in 2013 and 2014, *Atmos. Chem. Phys.*, 17, 10 767–10 794, <https://doi.org/10.5194/acp-17-10767-2017>, 2017.
- 30 Heintzenberg, J.: The SAMUM-1 experiment over Southern Morocco: overview and introduction, *Tellus B*, 61, 2–11, <https://doi.org/10.1111/j.1600-0889.2008.00403.x>, 2009.
- Huang, J., Zhang, C., and Prospero, J. M.: African dust outbreaks: A satellite perspective of temporal and spatial variability over the tropical Atlantic Ocean, *J. Geophys. Res. - Atmos.*, 115, <https://doi.org/10.1029/2009JD012516>, 2010.
- Huneus, N., Schulz, M., Balkanski, Y., Griesfeller, J., Prospero, J., Kinne, S., Bauer, S., Boucher, O., Chin, M., Dentener, F., Diehl, T., Easter, R., Fillmore, D., Ghan, S., Ginoux, P., Grini, A., Horowitz, L., Koch, D., Krol, M. C., Landing, W., Liu, X., Mahowald, N., Miller,

- R., Morcrette, J.-J., Myhre, G., Penner, J., Perlwitz, J., Stier, P., Takemura, T., and Zender, C. S.: Global dust model intercomparison in AeroCom phase I, *Atmos. Chem. Phys.*, 11, 7781–7816, <https://doi.org/10.5194/acp-11-7781-2011>, 2011.
- Illingworth, A. J., Barker, H. W., Beljaars, A., Ceccaldi, M., Chepfer, H., Clerbaux, N., Cole, J., Delanoë, J., Domenech, C., Donovan, D. P., Fukuda, S., Hirakata, M., Hogan, R. J., Huenerbein, A., Kollias, P., Kubota, T., Nakajima, T., Nakajima, T. Y., Nishizawa, T., Ohno, Y., Okamoto, H., Oki, R., Sato, K., Satoh, M., Shephard, M. W., Velázquez-Blázquez, A., Wandinger, U., Wehr, T., and van Zadelhoff, G.-J.: The EarthCARE Satellite: The Next Step Forward in Global Measurements of Clouds, Aerosols, Precipitation, and Radiation, *B. Am. Meteorol. Soc.*, 96, 1311–1332, <https://doi.org/10.1175/bams-d-12-00227.1>, 2015.
- Ismail, S., Ferrare, R. A., Browell, E. V., Chen, G., Anderson, B., Kooi, S. A., Notari, A., Butler, C. F., Burton, S., Fenn, M., Dunion, J. P., Heymsfield, G., Krishnamurti, T. N., and Biswas, M. K.: LASE Measurements of Water Vapor, Aerosol, and Cloud Distributions in Saharan Air Layers and Tropical Disturbances, *J. Atmos. Sci.*, 67, 1026–1047, <https://doi.org/10.1175/2009JAS3136.1>, 2010.
- Jung, E., Albrecht, B., Prospero, J. M., Jonsson, H. H., and Kreidenweis, S. M.: Vertical structure of aerosols, temperature, and moisture associated with an intense African dust event observed over the eastern Caribbean, *J. Geophys. Res.- Atmos.*, 118, 4623–4643, <https://doi.org/10.1002/jgrd.50352>, 2013.
- Karydis, V. A., Kumar, P., Barahona, D., Sokolik, I. N., and Nenes, A.: On the effect of dust particles on global cloud condensation nuclei and cloud droplet number, *J. Geophys. Res. - Atmos.*, 116, <https://doi.org/10.1029/2011jd016283>, 2011.
- Klepp, C., Ament, F., Bakan, S., Hirsch, L., and Stevens, B.: NARVAL campaign report, Report, Max Planck Institut für Meteorologie, 2014.
- Krautstrunk, M. and Giez, A.: The Transition from FALCON to HALO Era Airborne Atmospheric Research, in: *Atmospheric Physics*, edited by Schumann, U., Research Topics in Aerospace, pp. 609–624, Springer Berlin Heidelberg, 2012.
- Lau, K. M. and Kim, K. M.: Cooling of the Atlantic by Saharan dust, *Geophys. Res. Lett.*, 34, <https://doi.org/10.1029/2007GL031538>, 2007.
- Liu, Z., Omar, A., Vaughan, M., Hair, J., Kittaka, C., Hu, Y., Powell, K., Trepte, C., Winker, D., Hostetler, C., Ferrare, R., and Pierce, R.: CALIPSO lidar observations of the optical properties of Saharan dust: A case study of long-range transport, *J. Geophys. Res. - Atmos.*, 113, <https://doi.org/10.1029/2007JD008878>, 2008.
- Lonitz, K., Stevens, B., Nuijens, L., Sant, V., Hirsch, L., and Seifert, A.: The Signature of Aerosols and Meteorology in Long-Term Cloud Radar Observations of Trade Wind Cumuli, *J. Atmos. Sci.*, 72, 4643–4659, <https://doi.org/10.1175/jas-d-14-0348.1>, 2015.
- Mahowald, N. M. and Kiehl, L. M.: Mineral aerosol and cloud interactions, *Geophys. Res. Lett.*, 30, <https://doi.org/10.1029/2002GL016762>, 1475, 2003.
- Marshall, J. H., Parker, D. J., Grams, C. M., Johnson, B. T., Grey, W. M. F., and Ross, A. N.: Observations of mesoscale and boundary-layer scale circulations affecting dust transport and uplift over the Sahara, *Atmos. Chem. Phys.*, 8, 6979–6993, <https://doi.org/10.5194/acp-8-6979-2008>, 2008.
- Mech, M., Orlandi, E., Crewell, S., Ament, F., Hirsch, L., Hagen, M., Peters, G., and Stevens, B.: HAMP – the microwave package on the High Altitude and Long range research aircraft (HALO), *Atmos. Meas. Tech.*, 7, 4539–4553, <https://doi.org/10.5194/amt-7-4539-2014>, 2014.
- Medeiros, B., Nuijens, L., Antoniazzi, C., and Stevens, B.: Low-latitude boundary layer clouds as seen by CALIPSO, *J. Geophys. Res. - Atmos.*, 115, <https://doi.org/10.1029/2010JD014437>, 2010.
- Nuijens, L. and Stevens, B.: The Influence of Wind Speed on Shallow Marine Cumulus Convection, *J. Atmos. Sci.*, 69, 168–184, <https://doi.org/10.1175/jas-d-11-02.1>, 2012.

- Nuijens, L., Stevens, B., and Siebesma, A. P.: The environment of precipitating shallow cumulus convection, *J. Atmos. Sci.*, 66, 1962–1979, <https://doi.org/10.1175/2008JAS2841.1>, 2009.
- Nuijens, L., Serikov, I., Hirsch, L., Lonitz, K., and Stevens, B.: The distribution and variability of low-level cloud in the North Atlantic trades, *Q. J. Roy. Meteor. Soc.*, 140, 2364–2374, <https://doi.org/10.1002/qj.2307>, 2014.
- 5 Prospero, J. M. and Carlson, T. N.: Vertical and areal distribution of Saharan dust over the western equatorial north Atlantic Ocean, *J. Geophys. Res.*, 77, 5255–5265, <https://doi.org/10.1029/JC077i027p05255>, 1972.
- Prospero, J. M. and Lamb, P. J.: African droughts and dust transport to the Caribbean: climate change implications, *Science*, 302, 1024–1027, <https://doi.org/10.1126/science.1089915>, 2003.
- Sakai, T., Nagai, T., Zaizen, Y., and Mano, Y.: Backscattering linear depolarization ratio measurements of mineral, sea-salt, and ammonium sulfate particles simulated in a laboratory chamber, *Appl. Opt.*, 49, 4441, <https://doi.org/10.1364/ao.49.004441>, 2010.
- 10 Seifert, P., Ansmann, A., Mattis, I., Wandinger, U., Tesche, M., Engelmann, R., Müller, D., Pérez, C., and Hausteiner, K.: Saharan dust and heterogeneous ice formation: Eleven years of cloud observations at a central European EARLINET site, *J. Geophys. Res.*, 115, <https://doi.org/10.1029/2009jd013222>, 2010.
- Stein, A. F., Draxler, R. R., Rolph, G. D., Stunder, B. J. B., Cohen, M. D., and Ngan, F.: NOAA’s HYSPLIT atmospheric transport and dispersion modeling system, *B. Am. Meteorol. Soc.*, 96, 2059–2077, <https://doi.org/10.1175/BAMS-D-14-00110.1>, 2015.
- 15 Stephens, G. L., Vane, D. G., Boain, R. J., Mace, G. G., Sassen, K., Wang, Z., Illingworth, A. J., O’Connor, E. J., Rossow, W. B., Durden, S. L., Miller, S. D., Austin, R. T., Benedetti, A., Mitrescu, C., and the CloudSat Science Team.: The CloudSat Mission and the A-Train, *B. Am. Meteorol. Soc.*, 83, 1771–1790, <https://doi.org/10.1175/BAMS-83-12-1771>, 2002.
- Stephens, G. L., Wood, N. B., and Pakula, L. A.: On the radiative effects of dust on tropical convection, *Geophys. Res. Lett.*, 31, <https://doi.org/10.1029/2004gl021342>, 2004.
- 20 Stevens, B., Brogniez, H., Kiemle, C., Lacour, J.-L., Crevoisier, C., and Kiliani, J.: Structure and Dynamical Influence of Water Vapor in the Lower Tropical Troposphere, *Surv. Geophys.*, 38, 1371–1397, <https://doi.org/10.1007/s10712-017-9420-8>, 2017.
- Stevens, B., Ament, F., Bony, S., Crewell, S., Groß, S., Hirsch, L., Mayer, B., Wendisch, M., Wirth, M., Bakan, S., Brück, H.-M., Ehrlich, A., Ewald, F., Farrell, D., Forde, M., Göttsche, F., Grob, H., Hagen, M., Hansen, A., Jacob, M., Jäkel, E., Jansen, F., Klepp, C., Klingebiel, M., Kölling, T., Konow, H., Mech, M., Peters, G., Rapp, M., Wing, A., and Wolf, K.: A high-altitude long-range aircraft configured as a cloud observatory - the NARVAL expeditions, *B. Am. Meteorol. Soc.*, 2018, submitted.
- 25 Stevens, B., Ament, F., Bony, S., Crewell, S., Ewald, F., Groß, S., Hansen, A., Hirsch, L., Jacob, M., Kölling, T., Konow, H., Mayer, B., Wendisch, M., Wirth, M., Wolf, K., Bakan, S., Bauer-Pfundstein, M., Brueck, M., Delanoë, J., Ehrlich, A., Farrell, D., Forde, M., Göttsche, F., Grob, H., Hagen, M., Jäkel, E., Jansen, F., Klepp, C., Klingebiel, M., Mech, M., Peters, G., Rapp, M., Wing, A. A., and Zinner, T.: A high-altitude long-range aircraft configured as a cloud observatory - the NARVAL expeditions, *B. Am. Meteorol. Soc.*, <https://doi.org/10.1175/bams-d-18-0198.1>, 2019.
- 30 Tesche, M., Ansmann, A., Müller, D., Althausen, D., Mattis, I., Heese, B., Freudenthaler, V., Wiegner, M., Esselborn, M., Pisani, G., and Knippertz, P.: Vertical profiling of Saharan dust with Raman lidars and airborne HSRL in southern Morocco during SAMUM, *Tellus B*, 61, 144–164, <https://doi.org/10.1111/j.1600-0889.2008.00390.x>, 2009.
- 35 Twomey, S.: Pollution and the planetary albedo, *Atmos. Environ.* (1967), 8, 1251–1256, [https://doi.org/10.1016/0004-6981\(74\)90004-3](https://doi.org/10.1016/0004-6981(74)90004-3), 1974.
- Twomey, S.: The Influence of Pollution on the Shortwave Albedo of Clouds, *J. Atmos. Sci.*, 34, 1149–1152, [https://doi.org/10.1175/1520-0469\(1977\)034<1149:tiopot>2.0.co;2](https://doi.org/10.1175/1520-0469(1977)034<1149:tiopot>2.0.co;2), 1977.

- Weinzierl, B., Ansmann, A., Prospero, J. M., Althausen, D., Benker, N., Chouza, F., Dollner, M., Farrell, D., Fomba, W. K., Freudenthaler, V., Gasteiger, J., Groß, S., Haarig, M., Heinold, B., Kandler, K., Kristensen, T. B., Mayol-Bracero, O. L., Müller, T., Reitebuch, O., Sauer, D., Schäfler, A., Schepanski, K., Spanu, A., Tegen, I., Toledano, C., and Walser, A.: The Saharan Aerosol Long-Range Transport and Aerosol-Cloud-Interaction Experiment: overview and selected highlights, *B. Am. Meteorol. Soc.*, 98, 1427–1451, <https://doi.org/10.1175/BAMS-D-15-00142.1>, 2017.
- 5 Wendisch, M., Müller, D., Schell, D., and Heintzenberg, J.: An Airborne Spectral Albedometer with Active Horizontal Stabilization, *J. Atmos. Ocean. Tech.*, 18, 1856–1866, [https://doi.org/10.1175/1520-0426\(2001\)018<1856:aasawa>2.0.co;2](https://doi.org/10.1175/1520-0426(2001)018<1856:aasawa>2.0.co;2), 2001.
- Wiegner, M., Groß, S., Freudenthaler, V., Schnell, F., and Gasteiger, J.: The May/June 2008 Saharan dust event over Munich: Intensive aerosol parameters from lidar measurements, *J. Geophys. Res. - Atmos.*, 116, <https://doi.org/10.1029/2011jd016619>, 2011.
- 10 Winker, D. M., Pelon, J., Coakley, J. A., Ackerman, S. A., Charlson, R. J., Colarco, P. R., Flamant, P., Fu, Q., Hoff, R. M., Kittaka, C., Kubar, T. L., Le Treut, H., McCormick, M. P., Mégie, G., Poole, L., Powell, K., Trepte, C., Vaughan, M. A., and Wielicki, B. A.: The CALIPSO mission: A global 3D view of aerosols and clouds, *B. Am. Meteorol. Soc.*, 91, 1211–1229, <https://doi.org/10.1175/2010BAMS3009.1>, 2010.
- Wirth, M., Fix, A., Mahnke, P., Schwarzer, H., Schrandt, F., and Ehret, G.: The airborne multi-wavelength water vapor differential absorption  
15 lidar WALES: system design and performance, *Appl. Phys. B*, 96, 201–213, <https://doi.org/10.1007/s00340-009-3365-7>, 2009.
- Wong, S. and Dessler, A. E.: Suppression of deep convection over the tropical North Atlantic by the Saharan air layer, *Geophys. Res. Lett.*, 32, <https://doi.org/10.1029/2004gl022295>, 2005.
- Wong, S., Colarco, P. R., and Dessler, A. E.: Principal component analysis of the evolution of the Saharan air layer and  
20 dust transport: comparisons between a model simulation and MODIS and AIRS retrievals, *J. Geophys. Res.- Atmos.*, 111, <https://doi.org/10.1029/2006JD007093>, 2006.
